# Supplementary material for: Comprehensive evaluation of a prospective Australian patient cohort with suspected genetic kidney disease undergoing clinical genomic testing: a study protocol
Source: PubMed Central journal article supplement — BMJ Open. 2019 Aug 5;9(8):e029541. doi: 10.1136/bmjopen-2019-029541 (PMC6687024; doi:10.1136/bmjopen-2019-029541), 2019-08-05
Supplement: bmjopen-2019-029541.draft_revisions.pdf [file bmjopen-2019-029541.draft_revisions.pdf]

# BMJ Open

BMJ Open is committed to open peer review. As part of this commitment we make the peer review history of every article we publish publicly available.

When an article is published we post the peer reviewers' comments and the authors' responses online. We also post the versions of the paper that were used during peer review. These are the versions that the peer review comments apply to.

The versions of the paper that follow are the versions that were submitted during the peer review process. They are not the versions of record or the final published versions. They should not be cited or distributed as the published version of this manuscript.

BMJ Open is an open access journal and the full, final, typeset and author-corrected version of record of the manuscript is available on our site with no access controls, subscription charges or pay-per-view fees (<http://bmjopen.bmj.com>).

If you have any questions on BMJ Open's open peer review process please email [info.bmjopen@bmj.com](mailto:info.bmjopen@bmj.com)

# BMJ Open

## A study protocol for comprehensive evaluation of clinical genomic testing in patients with suspected genetic kidney disease

|                               |                                                                                                                                                                                                                                                                                                                                                                                                                                                                                                                                                                                                                                                                                                                                                                                                                                                                                                                                                                                                                                                                                                                                                                                                                                                                                                                                                                                                                                                                                                                                                                                                                                                                                                                                                                                                                                                                                                                                                                                                                                                                                                                                                                                                                                                                                                                                                                       |
|-------------------------------|-----------------------------------------------------------------------------------------------------------------------------------------------------------------------------------------------------------------------------------------------------------------------------------------------------------------------------------------------------------------------------------------------------------------------------------------------------------------------------------------------------------------------------------------------------------------------------------------------------------------------------------------------------------------------------------------------------------------------------------------------------------------------------------------------------------------------------------------------------------------------------------------------------------------------------------------------------------------------------------------------------------------------------------------------------------------------------------------------------------------------------------------------------------------------------------------------------------------------------------------------------------------------------------------------------------------------------------------------------------------------------------------------------------------------------------------------------------------------------------------------------------------------------------------------------------------------------------------------------------------------------------------------------------------------------------------------------------------------------------------------------------------------------------------------------------------------------------------------------------------------------------------------------------------------------------------------------------------------------------------------------------------------------------------------------------------------------------------------------------------------------------------------------------------------------------------------------------------------------------------------------------------------------------------------------------------------------------------------------------------------|
| Journal:                      | <i>BMJ Open</i>                                                                                                                                                                                                                                                                                                                                                                                                                                                                                                                                                                                                                                                                                                                                                                                                                                                                                                                                                                                                                                                                                                                                                                                                                                                                                                                                                                                                                                                                                                                                                                                                                                                                                                                                                                                                                                                                                                                                                                                                                                                                                                                                                                                                                                                                                                                                                       |
| Manuscript ID                 | bmjopen-2019-029541                                                                                                                                                                                                                                                                                                                                                                                                                                                                                                                                                                                                                                                                                                                                                                                                                                                                                                                                                                                                                                                                                                                                                                                                                                                                                                                                                                                                                                                                                                                                                                                                                                                                                                                                                                                                                                                                                                                                                                                                                                                                                                                                                                                                                                                                                                                                                   |
| Article Type:                 | Protocol                                                                                                                                                                                                                                                                                                                                                                                                                                                                                                                                                                                                                                                                                                                                                                                                                                                                                                                                                                                                                                                                                                                                                                                                                                                                                                                                                                                                                                                                                                                                                                                                                                                                                                                                                                                                                                                                                                                                                                                                                                                                                                                                                                                                                                                                                                                                                              |
| Date Submitted by the Author: | 30-Jan-2019                                                                                                                                                                                                                                                                                                                                                                                                                                                                                                                                                                                                                                                                                                                                                                                                                                                                                                                                                                                                                                                                                                                                                                                                                                                                                                                                                                                                                                                                                                                                                                                                                                                                                                                                                                                                                                                                                                                                                                                                                                                                                                                                                                                                                                                                                                                                                           |
| Complete List of Authors:     | <p>Jayasinghe, Kushani; Monash Health, Nephrology; Monash University, Medicine</p> <p>Stark, Zornitza; Australian Genomics Health Alliance, Australian Genomics Health Alliance; Murdoch Children's Research Institute</p> <p>Patel, Chirag; Royal Brisbane and Women's Hospital; KidGen Collaborative and Renal Genetics Flagships</p> <p>Mallawaarachchi, Amali; Australian Genomics Health Alliance, Australian Genomics Health Alliance; Royal Prince Alfred Hospital</p> <p>McCarthy, Hugh; Australian Genomics Health Alliance, Australian Genomics Health Alliance; Sydney Children's Hospitals Network</p> <p>Faull, Randall; Royal Adelaide Hospital; Australian Genomics Health Alliance, Australian Genomics Health Alliance</p> <p>Chakera, Aron; Sir Charles Gairdner Hospital, Nephrology and Renal Transplantation; Australian Genomics Health Alliance, Australian Genomics Health Alliance</p> <p>Sundaram, Madhivanan; Australian Genomics Health Alliance, Australian Genomics Health Alliance; Royal Darwin Hospital</p> <p>Jose, Matthew; University of Tasmania School of Medicine, ; Royal Hobart Hospital</p> <p>Kerr, Peter; Monash Medical Centre, Nephrology; Monash University, Medicine</p> <p>Wu, You; Australian Genomics Health Alliance, Australian Genomics Health Alliance; University of Melbourne, Health Economics Unit, Centre for Health Policy</p> <p>Wardrop, Louise; Australian Genomics Health Alliance, Australian Genomics Health Alliance; Murdoch Children's Research Institute</p> <p>Goranitis, I; Australian Genomics Health Alliance, Australian Genomics Health Alliance; University of Melbourne, Health Economics Unit, Centre for Health Policy</p> <p>Best, Stephanie; Australian Institute of Health Innovation, Centre for Healthcare Resilience and Implementation Science, Macquarie University; Murdoch Children's Research Institute, Australian Genomics</p> <p>Martyn, Melissa; Melbourne Genomics Health Alliance; Murdoch Children's Research Institute, Genetics Education and Health Research</p> <p>Quinlan, Catherine; Melbourne Genomics Health Alliance; Royal Children's Hospital, Department of Paediatric Nephrology</p> <p>Mallett, Andrew; Australian Genomics Health Alliance, Australian Genomics Health Alliance; Royal Brisbane and Women's Hospital, Genetic Health Queensland</p> |

1  
2  
3  
4  
5  
6  
7  
8  
9  
10  
11  
12  
13  
14  
15  
16  
17  
18  
19  
20  
21  
22  
23  
24  
25  
26  
27  
28  
29  
30  
31  
32  
33  
34  
35  
36  
37  
38  
39  
40  
41  
42  
43  
44  
45  
46  
47  
48  
49  
50  
51  
52  
53  
54  
55  
56  
57  
58  
59  
60

|           |                                                                                            |
|-----------|--------------------------------------------------------------------------------------------|
| Keywords: | Chronic renal failure < NEPHROLOGY, genetic kidney disease, GENETICS, genomics, NEPHROLOGY |
|           |                                                                                            |

SCHOLARONE™  
Manuscripts

**A study protocol for comprehensive evaluation of clinical genomic testing in patients  
with suspected genetic kidney disease**

Kushani Jayasinghe<sup>1,2,3,4,5</sup>, Zornitza Stark<sup>3,5,6</sup>, Chirag Patel<sup>3,7</sup>, Amali Mallawaarachchi<sup>3,8,9</sup>,  
Hugh J McCarthy<sup>3,10,11</sup>, Randall Faull<sup>3,12</sup>, Aron Chakera<sup>3,13</sup>, Madhivanan Sundaram<sup>3,14</sup>,  
Matthew D. Jose<sup>3,15,16</sup>, Peter G Kerr<sup>1,2,4</sup>, You Wu<sup>3,5,17</sup>, Louise Wardrop<sup>3,4,5</sup>, Ilias  
Goranitis<sup>3,5,17</sup>, Stephanie Best<sup>3,5,18</sup>, Melissa Martyn<sup>4,5,6</sup>, Catherine Quinlan<sup>3,4,5,6,19\*</sup> and  
Andrew Mallett<sup>3,5,20,21\*</sup> on behalf of the KidGen Collaborative

<sup>1</sup>Department of Nephrology, Monash Medical Centre, Melbourne, Australia

<sup>2</sup>Monash University, Melbourne, Australia

<sup>3</sup>Australian Genomics Health Alliance, Australia

<sup>4</sup>Melbourne Genomics Health Alliance, Australia

<sup>5</sup>Murdoch Children's Research Institute, Melbourne, Australia

<sup>6</sup>Department of Paediatrics, University of Melbourne, Australia

<sup>7</sup>Genetic Health Queensland, Royal Brisbane and Women's Hospital, Brisbane, Australia

<sup>8</sup>Department of Medical Genomics, Royal Prince Alfred Hospital, Sydney, Australia

<sup>9</sup>Garvan Institute of Medical Research, Sydney, Australia

<sup>10</sup>Sydney Children's Hospitals Network, Sydney, Australia

<sup>11</sup>Children's Hospital Westmead Clinical School, University of Sydney, Australia

<sup>12</sup>Royal Adelaide Hospital, Adelaide, Australia

<sup>13</sup>Sir Charles Gairdner Hospital, Perth, Australia

<sup>14</sup>Royal Darwin Hospital, Darwin, Australia

<sup>15</sup>Royal Hobart Hospital, Hobart, Australia

<sup>16</sup>School of Medicine, University of Tasmania

<sup>17</sup>Health Economics Unit, Centre for Health Policy, University of Melbourne, Melbourne, Australia

<sup>18</sup>Centre for Healthcare Resilience and Implementation Science, Australian Institute of Health Innovation, Macquarie University, Sydney, Australia,

<sup>19</sup>Department of Paediatric Nephrology, Royal Children's Hospital, Melbourne, Australia

<sup>20</sup>Kidney Health Service and Conjoint Renal Research Laboratory, Royal Brisbane and Women's Hospital, Brisbane, Australia

<sup>21</sup>Institute for Molecular Bioscience and Faculty of Medicine, The University of Queensland, Brisbane, Australia

1  
2  
3 \* contributed equally  
4  
5  
6

7 **Running Head:** A protocol for comprehensive evaluation of genomic testing in nephrology

8 **Abstract Word Count:** 269

9 **Manuscript Word Count:** 2560

10 **Corresponding Author:**

11 Andrew J. Mallett

12 Email: Andrew.mallett@health.qld.gov.au

13 Address: Department of Renal Medicine, Level 9 Ned Hanlon Building, Royal Brisbane and  
14 Women's Hospital, Butterfield Street, Herston, Queensland 4029, Australia

15 Phone number: +61 (0)7 3636 8111

16 Fax number: +61 (0)7 3646 1560  
17  
18  
19  
20  
21  
22  
23  
24  
25  
26  
27  
28  
29  
30  
31  
32  
33  
34  
35  
36  
37  
38  
39  
40  
41  
42  
43  
44  
45  
46  
47  
48  
49  
50  
51  
52  
53  
54  
55  
56  
57  
58  
59  
60

## ABSTRACT

### Introduction

Recent advances in genomic technology have allowed better delineation of renal conditions, the identification of new kidney disease genes and subsequent targets for therapy. To date however, the utility of genomic testing in a clinically ascertained, prospectively recruited kidney disease cohort remains unknown. The aim of this study is to explore the clinical utility and cost effectiveness of genomic testing within a national cohort of patients with suspected genetic kidney disease who attend multidisciplinary renal genetics clinics.

### Methods and Analysis

This is a prospective observational cohort study performed at 16 centres throughout Australia. Patients will be included if they are referred to one of the multidisciplinary renal genetics clinics and are deemed likely to have a genetic basis to their kidney disease by the multidisciplinary renal genetics team. The expected cohort consists of 360 adult and paediatric patients recruited by December 2018 with ongoing validation cohort who will be recruited until June 2020. The primary outcome will be the proportion of patients who receive a molecular diagnosis via genomic testing (diagnostic rate) compared to usual care. Secondary outcomes will include change in clinical diagnosis following genomic testing, change in clinical management following genomic testing, and the cost-effectiveness of genomic testing compared to usual care.

### Ethics and dissemination

The project has received ethics approval from the Melbourne Health Human Research Ethics Committee as part of the Australian Genomics Health Alliance protocol: HREC/16/MH/251. All participants will provide informed consent for data collection and to undergo clinically relevant genetic/genomic testing. The results of this study will be published in peer-reviewed journals and will also be presented at national and international conferences.

## STRENGTHS AND LIMITATIONS

- This is a prospectively conducted multicentre national study in which patient data will be captured in the real-world setting
- Patients will be recruited for clinically indicated genomic testing for suspected genetic kidney disorders
- Due to the heterogeneity of genetic testing availability in Australia, it will not be equitable or practical to have a concurrent control arm for comparison
- This study will contribute to the future research and clinical service redesign by establishing the utility of genomic testing in a kidney disease cohort from patient, clinician and health resource perspectives

## INTRODUCTION

Genetic Kidney Disease (GKD) accounts for 10% of adults with chronic kidney disease (1), with a monogenic cause being identified in around 20% of those with early onset CKD (2). Recent advances in genomic sequencing have enabled rapid and cost-effective sequencing of large amounts of DNA (3) via massively parallel sequencing, otherwise known as next generation sequencing (NGS). This in turn has led to better delineation of GKD, the identification of new renal disease genes and subsequent targets for therapy(4). Moreover, the clinical implementation of genomic testing has increased the number of patients receiving a timely and accurate genetic diagnosis(5). NGS-based genetic testing has demonstrated a monogenic cause in 20% of patients with early onset chronic kidney disease (CKD), and almost 10% in an unselected cohort of 3000 adults with CKD(2, 6). A genomic diagnosis has many potential benefits including enabling targeted therapies(7-9), preventing the use of inappropriate treatments(10) and reducing the use of invasive diagnostic investigations such as renal biopsy. In addition to concluding a sometimes protracted diagnostic odyssey, a genomic diagnosis may also provide prognostic information, inform targeted surveillance for extra-renal complications and facilitate transplantation and reproductive planning. Despite these potential benefits, there is a paucity of comprehensive evaluations of clinical utility and health economic impact of genomic testing in kidney disease cohorts.

Multifaceted novel approaches are required to address the complexities of successfully implementing genomic technologies into clinical care. Diagnostic renal genetics clinics (RGC) apply a multidisciplinary team approach through collaboration between adult and paediatric nephrologists, clinical geneticists, genetic counsellors and diagnostic laboratory scientists. Whilst RGCs are operational in several countries, there is a lack of reported outcomes of this clinical model of care(5, 11).

The purpose of this study is to comprehensively determine the clinical utility and cost effectiveness of genomic testing in patients with suspected genetic kidney disease seen in a multidisciplinary RGC, and to compare this with their care and clinical diagnosis prior to referral. In addition, we aim to evaluate the value of a multidisciplinary RGC model from a patient perspective.



## STUDY AIMS

1. To determine the proportion of patients with suspected GKD who obtain a positive diagnosis following genomic testing compared with their clinical diagnosis prior to testing
2. To determine the clinical impact of genomic testing at three months follow-up in a cohort of patients with suspected GKD and identify subgroups of patients more likely to have a clinical impact following genomic testing
3. To determine whether genomic testing in a cohort of patients with suspected GKD is cost effective compared to usual care, and to identify whether genomic testing is cost effective for specific subgroups
4. To provide access to further research genomics participation for patients with suspected genetic kidney disease who remain undiagnosed following clinical genomic testing
5. To determine patient preferences regarding a service delivery model for a dedicated renal genetics service
6. To determine the value of genomic testing in those with suspected GKD from a patient perspective

## METHODS AND ANALYSIS

### Study design

This prospective observational study will be undertaken at multiple Australian sites that provide multidisciplinary renal genetics services. There are 16 participating sites throughout Australia (Figure 1). Patients who are referred by their treating physician to these multidisciplinary renal genetics clinics will be recruited over 4 years (Figure 2). Due to the rare nature of GKD, and because genetic testing is performed as part of routine clinical care in most states/centres, it would not be equitable to have a control arm for this study. In order to enable determination of comparative clinical utility, planned diagnostic investigations will be nominated by the recruiting clinicians. In addition, data regarding any changes in management will be collected from the referring nephrologist at three months following the return of genomic testing results.

Recruitment of a baseline cohort of 360 participants occurred between 2017 and 2018 (Figure 3) and a further replication cohort will be recruited between 2019 and 2020. The replication

1  
2  
3 cohort will have the same data collected but will also include patients with a prior genomic  
4 diagnosis. These patients will not participate in evaluation surveys (described below). The  
5 cohort of patients is anticipated to be ethnically diverse with a broad spectrum of renal  
6 phenotypes, clinical diagnoses and severity of kidney disease. Patients seen in a  
7 multidisciplinary renal genetics clinic as part of standard clinical care will be invited to  
8 participate in the study if there is consensus of opinion by the clinic team that their kidney  
9 disease is likely genetic in origin. Patients with an existing molecularly confirmed genetic  
10 diagnosis and those with heterogeneous or complex diseases with a low or unlikely  
11 monogenic diagnosis rate by current genomic sequencing (such as isolated congenital  
12 abnormalities of the kidney and urinary tract (CAKUT)) (12) will be excluded in the baseline  
13 cohort. Patients who undergo only Sanger sequencing are excluded from the study. Patients  
14 who attend a RGC but do not undergo genetic testing through the clinic are also excluded  
15 from the study. This includes patients who decline clinically-indicated testing. Informed  
16 consent, both for clinical genomic testing and participation in the research study will be  
17 obtained by the nominated clinical geneticist, nephrologist or genetic counsellor at each site.  
18  
19  
20  
21  
22  
23  
24  
25  
26  
27  
28  
29

### 30 **Participant Identifiers**

31 All participants will be assigned a unique identifier for the purposes of this study at  
32 recruitment. Study data will be collected and managed using REDCap(13) electronic data  
33 capture tools hosted at Murdoch Children's Research Institute. Study investigators and other  
34 investigators, including the evaluation team, that are not involved in direct patient clinical  
35 care will receive all case details including results of genomic testing and demographic details,  
36 in a de-identified manner. Only the clinicians and scientists directly involved with patient  
37 care will know the identity of the patient DNA samples and be able to re-identify data  
38 associated with an individual study unique identifier.  
39  
40  
41  
42  
43  
44  
45  
46  
47

### 48 **Measures**

49 Once consented to the study, baseline demographic information, clinical information, and  
50 detailed phenotypic information will be recorded by clinicians in REDCap. Demographic  
51 data including age, gender, ethnicity, and English language status will be captured for all  
52 recruited patients. Further demographic information will be captured in patient surveys.  
53 Clinical data include suspected clinical diagnosis, comorbidities and types of specialists  
54 previously seen. A detailed family history and pedigree will be collected to identify the  
55 number of probands and at-risk relatives presenting for assessment. Comprehensive  
56  
57  
58  
59  
60

1  
2  
3 phenotypic information will also be collected including the presence of extra-renal features,  
4 renal impairment, urea and creatinine level, CKD stage, presence and details of hypertension,  
5 haematuria, proteinuria and biochemical/haematological abnormalities, results of imaging  
6 including ultrasound, CT and MRI, and results of renal biopsy if already performed. Data will  
7 also be collected regarding type of genomic test, outcomes of test and time taken to achieve  
8 diagnosis. Clinical diagnosis will be recorded as listed in the referral of each patient to a  
9 RGC, at the time of triaging for an RGC, prior to genomic testing and at the time of return of  
10 genomic testing results. This will enable comparison across multiple time points potentially  
11 leading up to a molecular genetic diagnosis.  
12  
13  
14  
15  
16  
17  
18  
19

### 20 **Evaluation Surveys**

21 Evaluation surveys will be distributed to be completed either online or on paper. Adult and  
22 proxy versions are available (parent for child). Participants are asked to complete the first  
23 survey at 2-3 weeks after attending the RGC and the second following their receipt of  
24 genomic test results. The surveys were developed based on existing surveys in use in the  
25 Melbourne Genomics Health Alliance.  
26  
27  
28  
29  
30  
31

32 The first survey (Table 1) captures additional demographic information and also includes  
33 questions about the experience of the consent process and views on the benefits of the  
34 multidisciplinary renal genetics clinic. The Genetic Counselling Outcomes Survey (14) is  
35 included in survey 1 and 2 to evaluate genetic counselling outcomes of the multidisciplinary  
36 clinic. Knowledge questions and a question on the likelihood of the test finding the cause of  
37 the kidney disease are included in survey 1 to gauge understanding. The first survey includes  
38 closed and open questions exploring hopes and expectations for testing. Willingness-to-pay  
39 questions designed specifically for this study are included in both surveys to gauge value.  
40 Validated multi-attribute quality of life instruments (SF-12 for adults and parents(15),  
41 CHU9D for children(16)) are included in surveys 1 and 2 to assess health related quality of  
42 life. The PedsQL(17) family impact module is included in survey 1 and 2 for parents to  
43 assess family impact. Both surveys include questions on family planning.  
44  
45  
46  
47  
48  
49  
50  
51  
52  
53

54 In addition to the measures described above, the second survey includes study-specific  
55 questions assessing understanding of the genomic results, impact this will have on the patient  
56 and their family and perceived value of genomic testing. The Decision Regret scale(18) is  
57 also included in survey 2.  
58  
59  
60

## Sequencing

Genomic sequencing will be undertaken and reported in clinically accredited laboratories. It is envisaged that these are likely to include but not be limited to the National Association of Testing Authorities accredited diagnostic laboratories at Children's Hospital at Westmead, Victorian Clinical Genetics Service, Genome.One, SA Pathology and PathWest. The specific clinical test requested for each participant will be selected by the treating clinician/s at the attending renal genetics clinic according to clinical indication. The spectrum of genomic testing that will be employed is anticipated to include targeted exome, whole exome and whole genome sequencing, including the application of virtual gene panels based on patient phenotype. When additional copy number variation assessment and/or variant confirmation is indicated, then multiplex ligation-dependent probe application, chromosomal microarray or Sanger sequencing may be undertaken in addition to genomic sequencing. The cost per test is expected to be AUD\$1200 to AUD\$2400 depending upon the specific test and diagnostic provider, with individual test costs to be ascertained directly. Further, each participant will have genomic sequencing performed once unless technical or sequence quality issues require re-sequencing to enable clinical reporting. Based on clinical indication, further analysis of disease or phenotype-specific virtual gene panels may occur, with any such sequence re-analysis being recorded.

All participants will provide clinical consent for genomic testing and analysis will be restricted to the assessment of genes related to the condition of interest. Secondary findings unrelated to the presenting condition will not be reported in this study. Consent for participation in the research study will be attained separately, which includes options to consent to accessing the Medicare Benefits Schedule (MBS) and Pharmaceutical Benefits scheme (PBS), hospital and emergency data sets and data sharing in addition to study evaluation data collection. In addition, an optional consent will be obtained in order to share data and samples for use in ethically approved research outside of the study.

## Health economic evaluation

A model-based economic evaluation will be conducted to assess the relative cost-effectiveness of implementing NGS in the diagnostic trajectory of patients with suspected GKD compared with usual care. A decision analytic model will be developed to estimate the expected costs and outcomes associated with diagnostic investigations and initial clinical

1  
2  
3 management over a time horizon of one year based on the outcomes of cost per additional  
4 diagnosis, cost per quality-adjusted life-year (QALY), and net monetary benefit. The analyses  
5 will be conducted from an Australian health care payer perspective. Depending on the impact  
6 of NGS testing on clinical management and the availability of published literature on long-  
7 term health outcomes following changes in management, long-term costs and effectiveness  
8 will also be modelled in the analysis. Deterministic and probabilistic sensitivity analyses will  
9 be undertaken to explore the robustness of the findings to plausible variations in key  
10 assumptions and analytical methods used, and to consider the broader issue of  
11 generalisability of the study's results. Cost-effectiveness acceptability curves will be  
12 generated to reflect decision uncertainty.  
13  
14  
15  
16  
17  
18  
19  
20  
21

### 22 **Study outcomes**

23  
24 The primary outcome will be the proportion of patients who receive a molecular diagnosis via  
25 genomic testing (diagnostic rate). Secondary outcomes will be change in clinical diagnosis  
26 following genomic testing, change in clinical management following genomic testing and cost-  
27 effectiveness of genomic testing compared to non-genomic diagnostic investigations. Survey  
28 outcomes will include the proportion of patients who preferred to be seen by the  
29 multidisciplinary team compared to those who prefer to be seen in individual clinics. In  
30 addition, the GCOS will be compared before and after testing and between those with a  
31 positive/negative genomic testing result.  
32  
33  
34  
35  
36  
37  
38  
39

### 40 **Data analysis**

41 Results on diagnostic and clinical utility will be expressed as frequencies and percentages for  
42 categorical variables and be compared using the chi-square test. Continuous non-normally  
43 distributed variables will be expressed as median (IQR) and compared using the Mann-  
44 Whitney test. Normally distributed continuous variables will be expressed as mean±SD and  
45 compared using the Student's t-test. Multivariable logistic regression will be performed to  
46 determine which variables may predict a positive genomic diagnosis, such as age of onset of  
47 CKD, aetiology of CKD, family history or presence of haematuria/proteinuria/cysts. This will  
48 help to develop professional guidelines regarding genomic testing in suspected GKD. In  
49 addition, the diagnostic rates between different genomic testing modalities will also be  
50 compared. The target sample size is 500 patients across both baseline and replication cohorts.  
51  
52  
53  
54  
55  
56  
57  
58  
59  
60

## DISCUSSION

In this protocol, we describe the rationale and methods for a prospective observational study of a national cohort of patients with suspected genetic renal disease that are referred to multidisciplinary renal genetics clinics throughout Australia. The strengths of this study are the multicentre design, prospective data collection and a real-world clinical setting. The absence of a control arm is a limitation of this study however it was not feasible to randomize patients in this study for two reasons. Firstly due to the rare nature of kidney disease, and secondly given that genomic testing is clinically indicated and performed routinely in some participating states/centres, it would be unethical to deny genomic testing to some patients. Further those patients not receiving a genomic test after clinical assessment are likely to do so in a non-random fashion thus precluding their analysis as a true control group.

Genomic technologies have transformed the concept of precision medicine in many specialities, however the potential benefits in kidney medicine are yet to be demonstrated. Until now, the diagnostic utility of genomic testing has been assessed in a small number of patients or in a research context (19, 20). In addition, while studies which perform genomic sequencing in larger cohorts (6, 21) are emerging, detailed phenotypic information is not being collected and there remains a paucity of data on clinical outcomes. Importantly, these large-scale studies include patients with all types of chronic kidney disease and are thus powered to understand prevalence of GKD rather than to determine utility and yield in a cohort in which the clinician suspects genetic disease(6). Data on genomic sequencing in a real-world clinical environment at a national scale for a targeted population of patients with suspected GKD are lacking and the health economic impacts of genomic testing are not well understood or established(22). We believe that collecting such detailed information from a prospectively ascertained cohort will enable us to determine the diagnostic yield and comprehensive clinical utility, to inform future practice recommendations.

Results from this study will provide the opportunity to determine the clinical utility of genomic testing in a large cohort of patients, and further enable analysis of which subgroups of patients may benefit most. By assessing the clinical utility, cost effectiveness and implementation aspects of genomic testing in patients with kidney disease, the results of this study will inform patients, treating physicians and health services and define priorities for future trials. Collectively, this is anticipated to have significant impacts upon clinical practice and health service redesign.

1  
2  
3  
4  
5  
6  
7  
8  
9  
10  
11  
12  
13  
14  
15  
16  
17  
18  
19  
20  
21  
22  
23  
24  
25  
26  
27  
28  
29  
30  
31  
32  
33  
34  
35  
36  
37  
38  
39  
40  
41  
42  
43  
44  
45  
46  
47  
48  
49  
50  
51  
52  
53  
54  
55  
56  
57  
58  
59  
60

For peer review only

## FUNDING STATEMENT

Operating as the KidGen Renal Genetics Flagship, this work was supported by the Melbourne Genomics Health Alliance (Melbourne Genomics) and grants from the Royal Children's Hospital Foundation and by the NHMRC Genomics TCR Grant 1113531, entitled Preparing Australia for Genomic Medicine: A proposal by the Australian Genomics Health Alliance. Melbourne Genomics is funded by the 10 members and the State Government of Victoria (Department of Health and Humans Services). In kind funding support was provided for renal genetics clinic operation and genomic test provision by Queensland Health (Metro North Hospital and Health Service; Children's Health Queensland Hospital and Health Service), New South Wales Health, South Australia Health, Western Australia Department of Health, Northern Territory Department of Health and Tasmanian Department of Health and Human Services.



## **ETHICS AND DISSEMINATION**

### **Ethics**

Ethics approval for this project has been obtained by Australian Genomics Health Alliance as part of the research study Australian Genomics Health Alliance: Preparing Australia for Genomic Medicine and issued by Melbourne Health HREC/16/MH/251. Governance site specific approval for the project has been obtained for each of the participating clinic sites. All participants will provide informed consent for data collection and to undergo clinically relevant genetic/genomic testing.

### **Dissemination Plan**

The main findings of this study will be published in peer-reviewed journals and will also be presented at national and international conferences. We will also issue reports of results of the study to the Australian Government, State/Territory Governments and health organizations in order to inform future policy and guidelines. This study will also contribute to the training and development of post-doctoral students.

## REFERENCES

1. Mallett A, Patel C, Salisbury A, Wang Z, Healy H, Hoy W. The prevalence and epidemiology of genetic renal disease amongst adults with chronic kidney disease in Australia. *Orphanet Journal of Rare Diseases*. 2014;9:98-.
2. Vivante A, Hildebrandt F. Exploring the genetic basis of early-onset chronic kidney disease. *Nature Reviews Nephrology*. 2016;12(3):133-46.
3. Rabbani B, Mahdiah N, Hosomichi K, Nakaoka H, Inoue I. Next-generation sequencing: impact of exome sequencing in characterizing Mendelian disorders. *Journal of human genetics*. 2012;57(10):621-32.
4. Groopman EE, Rasouly HM, Gharavi AG. Genomic medicine for kidney disease. *Nat Rev Nephrol*. 2018;14(2):83-104.
5. Mallett A, Fowles LF, McGaughran J, Healy H, Patel C. A multidisciplinary renal genetics clinic improves patient diagnosis. *Med J Aust*. 2016;204(2):58-9.
6. Groopman EE, Marasa M, Cameron-Christie S, Petrovski S, Aggarwal VS, Milo-Rasouly H, et al. Diagnostic Utility of Exome Sequencing for Kidney Disease. *The New England journal of medicine*. 2018.
7. Bresin E, Daina E, Noris M, Castelletti F, Stefanov R, Hill P, et al. Outcome of renal transplantation in patients with non-Shiga toxin-associated hemolytic uremic syndrome: prognostic significance of genetic background. *Clin J Am Soc Nephrol*. 2006;1(1):88-99.
8. Sellier-Leclerc AL, Fremeaux-Bacchi V, Dragon-Durey MA, Macher MA, Niaudet P, Guest G, et al. Differential impact of complement mutations on clinical characteristics in atypical hemolytic uremic syndrome. *J Am Soc Nephrol*. 2007;18(8):2392-400.
9. Gross O, Licht C, Anders HJ, Hoppe B, Beck B, Tonshoff B, et al. Early angiotensin-converting enzyme inhibition in Alport syndrome delays renal failure and improves life expectancy. *Kidney Int*. 2012;81(5):494-501.
10. Varner JD, Chryst-Stangl M, Esezobor CI, Solarin A, Wu G, Lane B, et al. Genetic Testing for Steroid-Resistant-Nephrotic Syndrome in an Outbred Population. *Frontiers in pediatrics*. 2018;6:307.
11. Alkanderi S, Yates LM, Johnson SA, Sayer JA. Lessons learned from a multidisciplinary renal genetics clinic. *Qjm*. 2017;110(7):453-7.
12. Nicolaou N, Pulit SL, Nijman IJ, Monroe GR, Feitz WF, Schreuder MF, et al. Prioritization and burden analysis of rare variants in 208 candidate genes suggest they do not play a major role in CAKUT. *Kidney Int*. 2016;89(2):476-86.

13. Harris PA, Taylor R, Thielke R, Payne J, Gonzalez N, Conde JG. Research electronic data capture (REDCap)--a metadata-driven methodology and workflow process for providing translational research informatics support. *J Biomed Inform.* 2009;42(2):377-81.
14. McAllister M, Wood AM, Dunn G, Shiloh S, Todd C. The Genetic Counseling Outcome Scale: a new patient-reported outcome measure for clinical genetics services. *Clin Genet.* 2011;79(5):413-24.
15. Brazier JE, Roberts J. The estimation of a preference-based measure of health from the SF-12. *Med Care.* 2004;42(9):851-9.
16. Furber G, Segal L. The validity of the Child Health Utility instrument (CHU9D) as a routine outcome measure for use in child and adolescent mental health services. *Health and quality of life outcomes.* 2015;13:22.
17. Glascoe FP. Using parents' concerns to detect and address developmental and behavioral problems. *Journal of the Society of Pediatric Nurses : JSPN.* 1999;4(1):24-35.
18. Brehaut JC, O'Connor AM, Wood TJ, Hack TF, Siminoff L, Gordon E, et al. Validation of a decision regret scale. *Medical decision making : an international journal of the Society for Medical Decision Making.* 2003;23(4):281-92.
19. Sadowski CE, Lovric S, Ashraf S, Pabst WL, Gee HY, Kohl S, et al. A single-gene cause in 29.5% of cases of steroid-resistant nephrotic syndrome. *J Am Soc Nephrol.* 2015;26(6):1279-89.
20. Heidet L, Moriniere V, Henry C, De Tomasi L, Reilly ML, Humbert C, et al. Targeted Exome Sequencing Identifies PBX1 as Involved in Monogenic Congenital Anomalies of the Kidney and Urinary Tract. *J Am Soc Nephrol.* 2017;28(10):2901-14.
21. Lata S, Marasa M, Li Y, Fasel DA, Groopman E, Jobanputra V, et al. Whole-Exome Sequencing in Adults With Chronic Kidney Disease: A Pilot Study. *Ann Intern Med.* 2018;168(2):100-9.
22. Schwarze K, Buchanan J, Taylor JC, Wordsworth S. Are whole-exome and whole-genome sequencing approaches cost-effective? A systematic review of the literature. *Genet Med.* 2018.

1  
2  
3  
4  
5  
6  
7  
8  
9  
10  
11  
12  
13  
14  
15  
16  
17  
18  
19  
20  
21  
22  
23  
24  
25  
26  
27  
28  
29  
30  
31  
32  
33  
34  
35  
36  
37  
38  
39  
40  
41  
42  
43  
44  
45  
46  
47  
48  
49  
50  
51  
52  
53  
54  
55  
56  
57  
58  
59  
60

**TABLES**
**Table 1.** Summary of survey measures

| Measure                                    | Description                                                                                                                                                                                           | S1 | S2 |
|--------------------------------------------|-------------------------------------------------------------------------------------------------------------------------------------------------------------------------------------------------------|----|----|
| Demographics                               | Age, gender, marital status, education, income, number of dependents in household, postcode, private health insurance status.                                                                         | X  |    |
| Patient reported outcomes measures         | CHU9D[ref] and PEDS family impact[ref] for paediatric surveys<br>OR<br>SF-12 [ref] for adult surveys                                                                                                  | X  | X  |
| Experience of the multidisciplinary clinic | Three study specific questions exploring advantages and disadvantages of multidisciplinary renal genetics clinics                                                                                     | X  | X  |
| Genetic counselling                        | 24-item scale measuring outcomes of genetic counselling GCOS-24[ref]                                                                                                                                  | X  | X  |
| Family planning                            | Four study specific questions addressing plans for another child, estimated recurrence of the kidney condition, concern about recurrence, interest in reproductive technologies (parent surveys only) | X  |    |

|                            |                                                                                                                                                                                                                                                                                                                                                               |   |   |
|----------------------------|---------------------------------------------------------------------------------------------------------------------------------------------------------------------------------------------------------------------------------------------------------------------------------------------------------------------------------------------------------------|---|---|
| Understanding              | In survey 1, 8 study specific questions address participant understanding of: types of potential results (4 questions), potential familial implications (1 question), ways in which the data can be used (2 questions); number of genes examined (1 question).<br>In survey 2, 2 study specific questions used to measure recall and understanding of result. | X | X |
| Willingness to pay (value) | Study specific questions included to establish a quantitative reference for the value placed on testing                                                                                                                                                                                                                                                       | X | X |
| Information provision      | Study specific questions to assess participant perception about the way in which information (3 items – S1) and results (3 items – S2) were provided                                                                                                                                                                                                          | X | X |
| Hopes/<br>Expectation      | Eight study specific questions exploring participants reasons for agreeing to the test, rated on a 5 point scale as extremely unimportant to extremely important                                                                                                                                                                                              | X |   |
| Likelihood                 | One study specific question to determine participant's perception of the likelihood testing will find the cause of the condition .                                                                                                                                                                                                                            | X |   |
| Decision regret            | 5 item scale measuring distress or remorse after a (health care) decision [ref O'Connor]                                                                                                                                                                                                                                                                      |   | X |
| Value of the test          | Eleven study specific questions exploring the value to participants of having had the test rated on a 4 point scale as not valuable to extremely valuable or not applicable                                                                                                                                                                                   |   | X |

|                    |                                                                                     |  |   |
|--------------------|-------------------------------------------------------------------------------------|--|---|
| Impact of the test | Two study specific questions asking about the impact of the test on family planning |  | X |
|--------------------|-------------------------------------------------------------------------------------|--|---|

**FIGURES**

**Figure 1.** Participating Renal Genetics Clinics

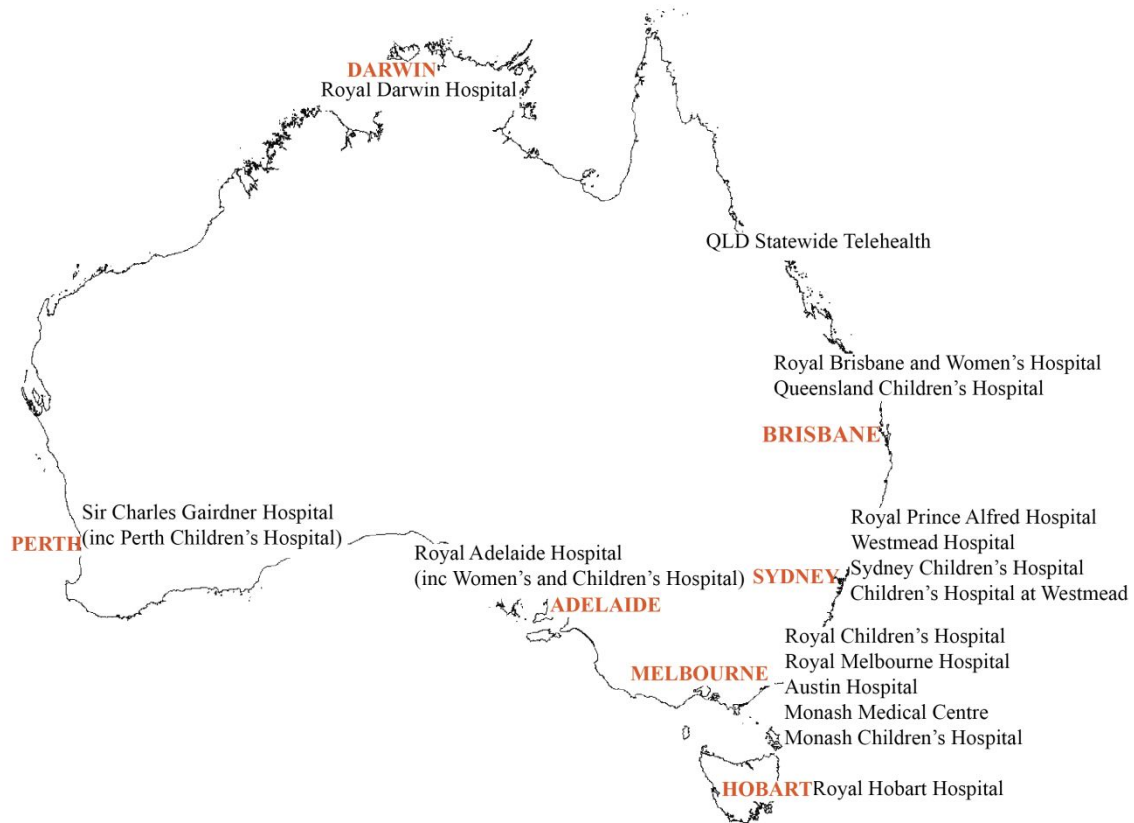

**Figure 2.** Patient flow within a KidGen Renal Genetics Clinic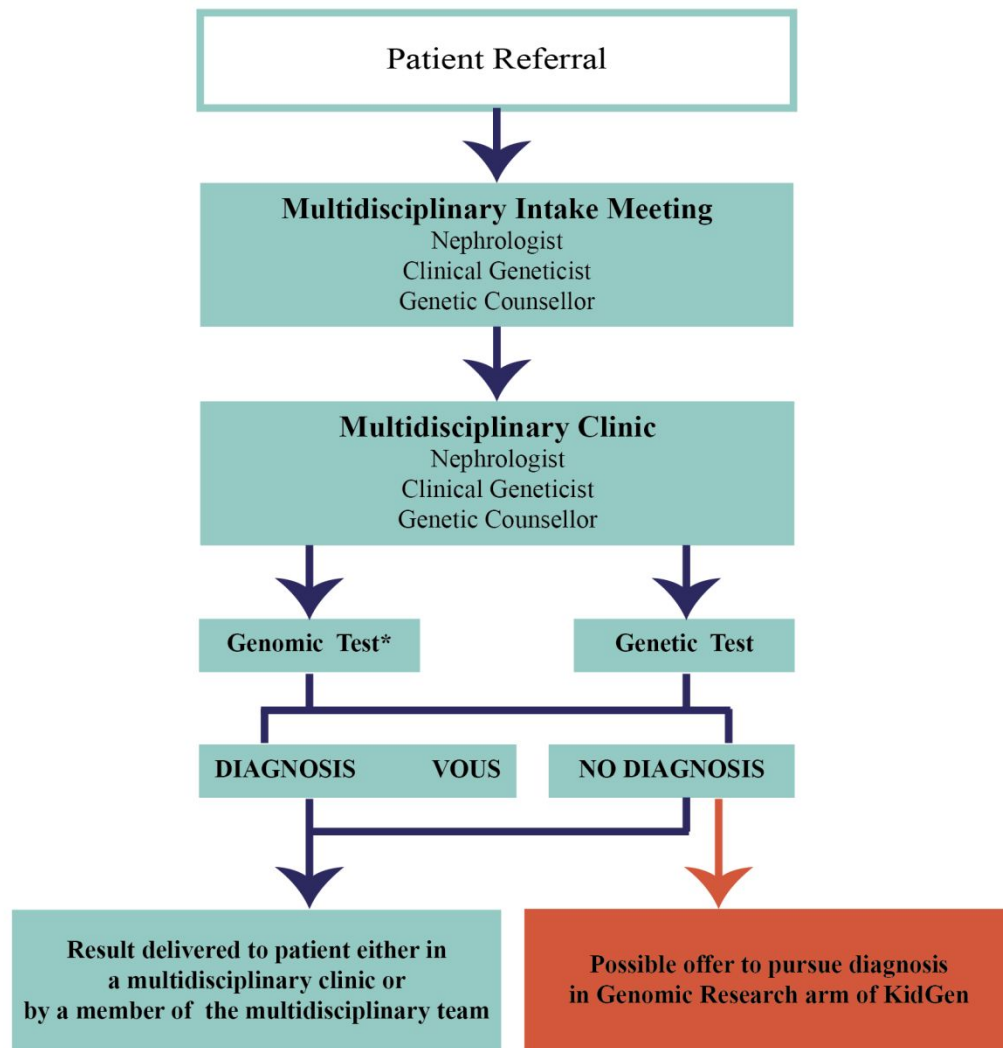

\* Prior to reporting results may be interpreted at a MDT by clinicians and laboratory scientists.

**Figure 3.** Recruitment workflow within the KidGen Renal Genetics Clinic network

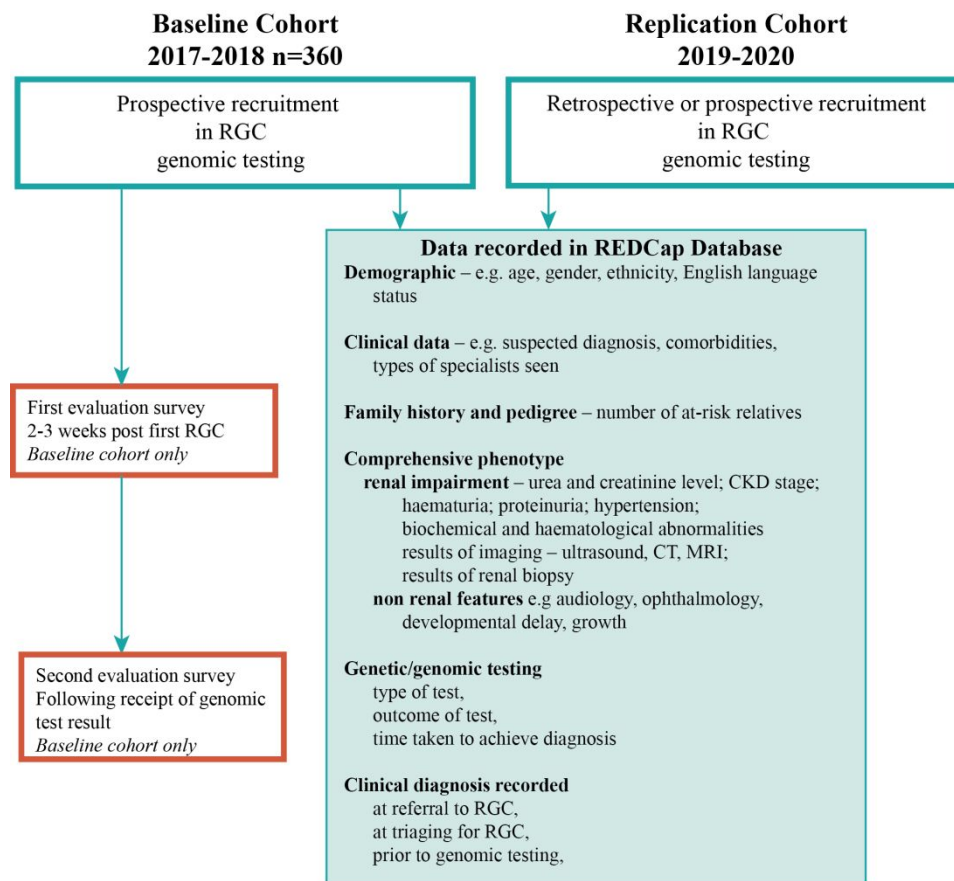

ew only



1  
2  
3  
4  
5  
6  
7  
8  
9  
10  
11  
12  
13  
14  
15  
16  
17  
18  
19  
20  
21  
22  
23  
24  
25  
26  
27  
28  
29  
30  
31  
32  
33  
34  
35  
36  
37  
38  
39  
40  
41  
42  
43  
44  
45  
46  
47  
48  
49  
50  
51  
52  
53  
54  
55  
56  
57  
58  
59  
60

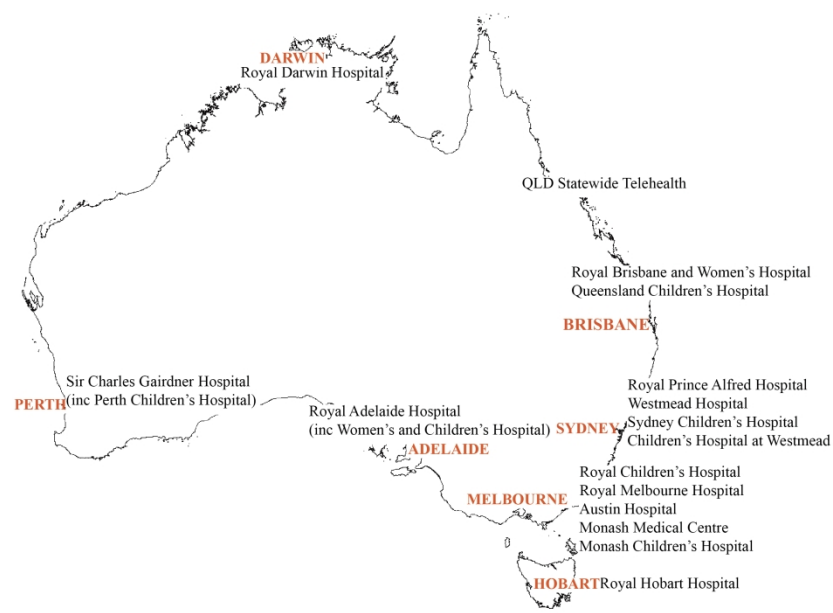

Figure 1. Participating Renal Genetics Clinics

1  
2  
3  
4  
5  
6  
7  
8  
9  
10  
11  
12  
13  
14  
15  
16  
17  
18  
19  
20  
21  
22  
23  
24  
25  
26  
27  
28  
29  
30  
31  
32  
33  
34  
35  
36  
37  
38  
39  
40  
41  
42  
43  
44  
45  
46  
47  
48  
49  
50  
51  
52  
53  
54  
55  
56  
57  
58  
59  
60

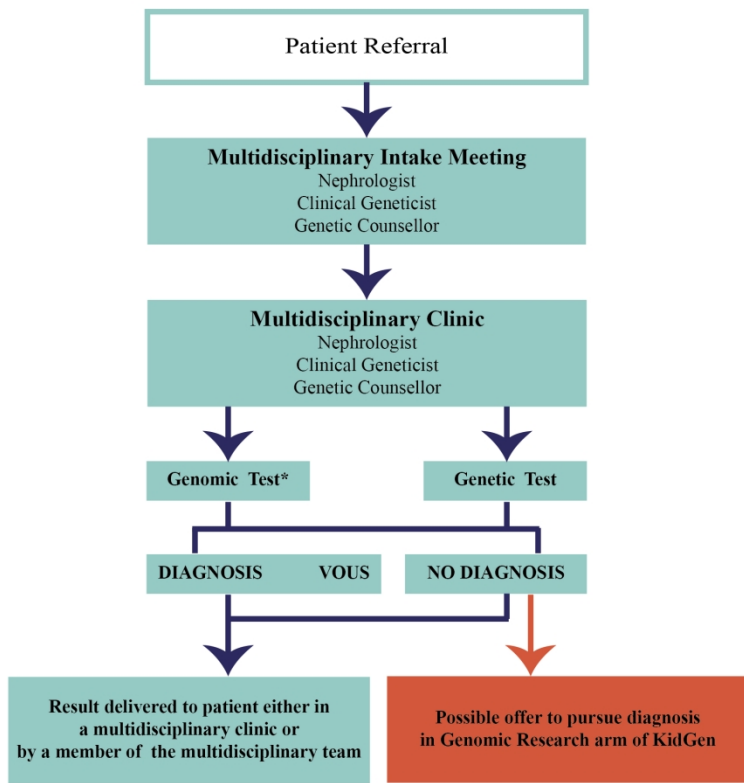

\* Prior to reporting results may be interpreted at a MDT by clinicians and laboratory scientists.

Figure 2. Patient flow within a KidGen Renal Genetics Clinic

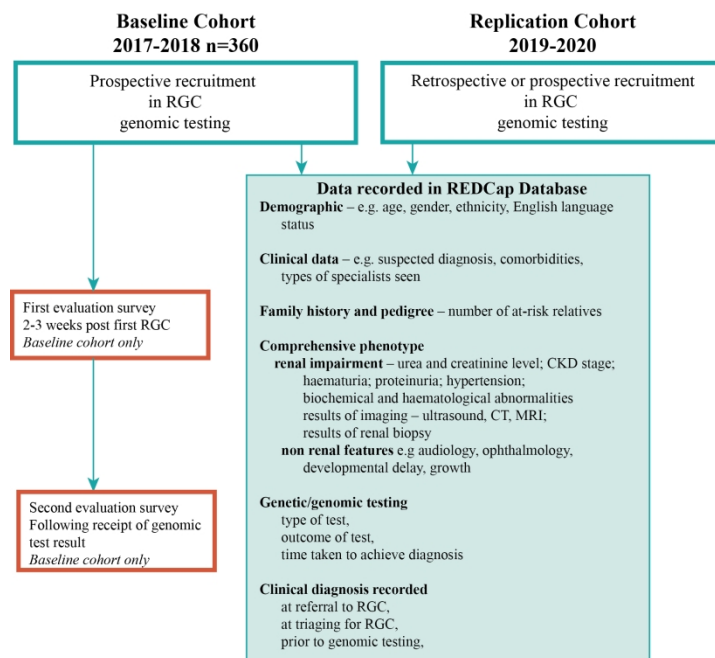

Figure 3. Recruitment workflow within the KidGen Renal Genetics Clinic network

# BMJ Open

## A study protocol for comprehensive evaluation of clinical genomic testing in patients with suspected genetic kidney disease

|                               |                                                                                                                                                                                                                                                                                                                                                                                                                                                                                                                                                                                                                                                                                                                                                                                                                                                                                                                                                                                                                                                                                                                                                                                                                                                                                                                                                                                                                                                                                                                                                                                                                                                                                                                                                                                                                                                                                                                                                                                                                                                                                                                                                                                                                                                                                                                                                                       |
|-------------------------------|-----------------------------------------------------------------------------------------------------------------------------------------------------------------------------------------------------------------------------------------------------------------------------------------------------------------------------------------------------------------------------------------------------------------------------------------------------------------------------------------------------------------------------------------------------------------------------------------------------------------------------------------------------------------------------------------------------------------------------------------------------------------------------------------------------------------------------------------------------------------------------------------------------------------------------------------------------------------------------------------------------------------------------------------------------------------------------------------------------------------------------------------------------------------------------------------------------------------------------------------------------------------------------------------------------------------------------------------------------------------------------------------------------------------------------------------------------------------------------------------------------------------------------------------------------------------------------------------------------------------------------------------------------------------------------------------------------------------------------------------------------------------------------------------------------------------------------------------------------------------------------------------------------------------------------------------------------------------------------------------------------------------------------------------------------------------------------------------------------------------------------------------------------------------------------------------------------------------------------------------------------------------------------------------------------------------------------------------------------------------------|
| Journal:                      | <i>BMJ Open</i>                                                                                                                                                                                                                                                                                                                                                                                                                                                                                                                                                                                                                                                                                                                                                                                                                                                                                                                                                                                                                                                                                                                                                                                                                                                                                                                                                                                                                                                                                                                                                                                                                                                                                                                                                                                                                                                                                                                                                                                                                                                                                                                                                                                                                                                                                                                                                       |
| Manuscript ID                 | bmjopen-2019-029541.R1                                                                                                                                                                                                                                                                                                                                                                                                                                                                                                                                                                                                                                                                                                                                                                                                                                                                                                                                                                                                                                                                                                                                                                                                                                                                                                                                                                                                                                                                                                                                                                                                                                                                                                                                                                                                                                                                                                                                                                                                                                                                                                                                                                                                                                                                                                                                                |
| Article Type:                 | Protocol                                                                                                                                                                                                                                                                                                                                                                                                                                                                                                                                                                                                                                                                                                                                                                                                                                                                                                                                                                                                                                                                                                                                                                                                                                                                                                                                                                                                                                                                                                                                                                                                                                                                                                                                                                                                                                                                                                                                                                                                                                                                                                                                                                                                                                                                                                                                                              |
| Date Submitted by the Author: | 07-Jun-2019                                                                                                                                                                                                                                                                                                                                                                                                                                                                                                                                                                                                                                                                                                                                                                                                                                                                                                                                                                                                                                                                                                                                                                                                                                                                                                                                                                                                                                                                                                                                                                                                                                                                                                                                                                                                                                                                                                                                                                                                                                                                                                                                                                                                                                                                                                                                                           |
| Complete List of Authors:     | <p>Jayasinghe, Kushani; Monash Health, Nephrology; Monash University, Medicine</p> <p>Stark, Zornitza; Australian Genomics Health Alliance, Australian Genomics Health Alliance; Murdoch Children's Research Institute</p> <p>Patel, Chirag; Royal Brisbane and Women's Hospital; KidGen Collaborative and Renal Genetics Flagships</p> <p>Mallawaarachchi, Amali; Australian Genomics Health Alliance, Australian Genomics Health Alliance; Royal Prince Alfred Hospital</p> <p>McCarthy, Hugh; Australian Genomics Health Alliance, Australian Genomics Health Alliance; Sydney Children's Hospitals Network</p> <p>Faull, Randall; Royal Adelaide Hospital; Australian Genomics Health Alliance, Australian Genomics Health Alliance</p> <p>Chakera, Aron; Sir Charles Gairdner Hospital, Nephrology and Renal Transplantation; Australian Genomics Health Alliance, Australian Genomics Health Alliance</p> <p>Sundaram, Madhivanan; Australian Genomics Health Alliance, Australian Genomics Health Alliance; Royal Darwin Hospital</p> <p>Jose, Matthew; University of Tasmania School of Medicine, ; Royal Hobart Hospital</p> <p>Kerr, Peter; Monash Medical Centre, Nephrology; Monash University, Medicine</p> <p>Wu, You; Australian Genomics Health Alliance, Australian Genomics Health Alliance; University of Melbourne, Health Economics Unit, Centre for Health Policy</p> <p>Wardrop, Louise; Australian Genomics Health Alliance, Australian Genomics Health Alliance; Murdoch Children's Research Institute</p> <p>Goranitis, I; Australian Genomics Health Alliance, Australian Genomics Health Alliance; University of Melbourne, Health Economics Unit, Centre for Health Policy</p> <p>Best, Stephanie; Australian Institute of Health Innovation, Centre for Healthcare Resilience and Implementation Science, Macquarie University; Murdoch Children's Research Institute, Australian Genomics</p> <p>Martyn, Melissa; Melbourne Genomics Health Alliance; Murdoch Children's Research Institute, Genetics Education and Health Research</p> <p>Quinlan, Catherine; Melbourne Genomics Health Alliance; Royal Children's Hospital, Department of Paediatric Nephrology</p> <p>Mallett, Andrew; Australian Genomics Health Alliance, Australian Genomics Health Alliance; Royal Brisbane and Women's Hospital, Genetic Health Queensland</p> |

1  
2  
3  
4  
5  
6  
7  
8  
9  
10  
11  
12  
13  
14  
15  
16  
17  
18  
19  
20  
21  
22  
23  
24  
25  
26  
27  
28  
29  
30  
31  
32  
33  
34  
35  
36  
37  
38  
39  
40  
41  
42  
43  
44  
45  
46  
47  
48  
49  
50  
51  
52  
53  
54  
55  
56  
57  
58  
59  
60

|                                   |                                                                                            |
|-----------------------------------|--------------------------------------------------------------------------------------------|
| <b>Primary Subject Heading:</b>   | Genetics and genomics                                                                      |
| <b>Secondary Subject Heading:</b> | Renal medicine                                                                             |
| <b>Keywords:</b>                  | Chronic renal failure < NEPHROLOGY, genetic kidney disease, GENETICS, genomics, NEPHROLOGY |
|                                   |                                                                                            |

SCHOLARONE™  
Manuscripts

**A study protocol for comprehensive evaluation of clinical genomic testing in patients  
with suspected genetic kidney disease**

Kushani Jayasinghe<sup>1,2,3,4,5</sup>, Zornitza Stark<sup>3,5,6</sup>, Chirag Patel<sup>3,7</sup>, Amali Mallawaarachchi<sup>3,8,9</sup>,  
Hugh J McCarthy<sup>3,10,11</sup>, Randall Faull<sup>3,12</sup>, Aron Chakera<sup>3,13</sup>, Madhivanan Sundaram<sup>3,14</sup>,  
Matthew D. Jose<sup>3,15,16</sup>, Peter G Kerr<sup>1,2,4</sup>, You Wu<sup>3,5,17</sup>, Louise Wardrop<sup>3,4,5</sup>, Ilias  
Goranitis<sup>3,5,17</sup>, Stephanie Best<sup>3,5,18</sup>, Melissa Martyn<sup>4,5,6</sup>, Catherine Quinlan<sup>3,4,5,6,19\*</sup> and  
Andrew Mallett<sup>3,5,20,21\*</sup> on behalf of the KidGen Collaborative

<sup>1</sup>Department of Nephrology, Monash Medical Centre, Melbourne, Australia

<sup>2</sup>Monash University, Melbourne, Australia

<sup>3</sup>Australian Genomics Health Alliance, Australia

<sup>4</sup>Melbourne Genomics Health Alliance, Australia

<sup>5</sup>Murdoch Children's Research Institute, Melbourne, Australia

<sup>6</sup>Department of Paediatrics, University of Melbourne, Australia

<sup>7</sup>Genetic Health Queensland, Royal Brisbane and Women's Hospital, Brisbane, Australia

<sup>8</sup>Department of Medical Genomics, Royal Prince Alfred Hospital, Sydney, Australia

<sup>9</sup>Garvan Institute of Medical Research, Sydney, Australia

<sup>10</sup>Sydney Children's Hospitals Network, Sydney, Australia

<sup>11</sup>Children's Hospital Westmead Clinical School, University of Sydney, Australia

<sup>12</sup>Royal Adelaide Hospital, Adelaide, Australia

<sup>13</sup>Sir Charles Gairdner Hospital, Perth, Australia

<sup>14</sup>Royal Darwin Hospital, Darwin, Australia

<sup>15</sup>Royal Hobart Hospital, Hobart, Australia

<sup>16</sup>School of Medicine, University of Tasmania

<sup>17</sup>Health Economics Unit, Centre for Health Policy, University of Melbourne, Melbourne, Australia

<sup>18</sup>Centre for Healthcare Resilience and Implementation Science, Australian Institute of Health Innovation, Macquarie University, Sydney, Australia,

<sup>19</sup>Department of Paediatric Nephrology, Royal Children's Hospital, Melbourne, Australia

<sup>20</sup>Kidney Health Service and Conjoint Renal Research Laboratory, Royal Brisbane and Women's Hospital, Brisbane, Australia

<sup>21</sup>Institute for Molecular Bioscience and Faculty of Medicine, The University of Queensland, Brisbane, Australia

1  
2  
3 \* contributed equally  
4  
5  
6

7 **Running Head:** A protocol for comprehensive evaluation of genomic testing in nephrology

8 **Abstract Word Count:** 271

9 **Manuscript Word Count:** 3043

10 **Corresponding Author:**

11 Andrew J. Mallett

12 Email: Andrew.mallett@health.qld.gov.au

13 Address: Department of Renal Medicine, Level 9 Ned Hanlon Building, Royal Brisbane and  
14 Women's Hospital, Butterfield Street, Herston, Queensland 4029, Australia

15 Phone number: +61 (0)7 3636 8111

16 Fax number: +61 (0)7 3646 1560  
17  
18  
19  
20  
21  
22  
23  
24  
25  
26  
27  
28  
29  
30  
31  
32  
33  
34  
35  
36  
37  
38  
39  
40  
41  
42  
43  
44  
45  
46  
47  
48  
49  
50  
51  
52  
53  
54  
55  
56  
57  
58  
59  
60

## ABSTRACT

### Introduction

Recent advances in genomic technology have allowed better delineation of renal conditions, the identification of new kidney disease genes and subsequent targets for therapy. To date however, the utility of genomic testing in a clinically ascertained, prospectively recruited kidney disease cohort remains unknown. The aim of this study is to explore the clinical utility and cost effectiveness of genomic testing within a national cohort of patients with suspected genetic kidney disease who attend multidisciplinary renal genetics clinics.

### Methods and Analysis

This is a prospective observational cohort study performed at 16 centres throughout Australia. Patients will be included if they are referred to one of the multidisciplinary renal genetics clinics and are deemed likely to have a genetic basis to their kidney disease by the multidisciplinary renal genetics team. The expected cohort consists of 360 adult and paediatric patients recruited by December 2018 with ongoing validation cohort of 140 patients who will be recruited until June 2020. The primary outcome will be the proportion of patients who receive a molecular diagnosis via genomic testing (diagnostic rate) compared to usual care. Secondary outcomes will include change in clinical diagnosis following genomic testing, change in clinical management following genomic testing, and the cost-effectiveness of genomic testing compared to usual care.

### Ethics and dissemination

The project has received ethics approval from the Melbourne Health Human Research Ethics Committee as part of the Australian Genomics Health Alliance protocol: HREC/16/MH/251. All participants will provide informed consent for data collection and to undergo clinically relevant genetic/genomic testing. The results of this study will be published in peer-reviewed journals and will also be presented at national and international conferences.



## STRENGTHS AND LIMITATIONS

- This is a prospectively conducted multicentre national study in which patient data will be captured in the real-world setting
- Patients will be recruited for clinically indicated genomic testing for suspected genetic kidney disorders, which may allow better generalizability of results
- Genomic testing is clinically indicated and performed routinely in some participating states/centres in Australia, and therefore it would be unethical to have a control arm for comparison as this would deny some patients of testing.
- This study will contribute to the future research and clinical service redesign by establishing the utility of genomic testing in a kidney disease cohort from patient, clinician and health resource perspectives

## INTRODUCTION

Genetic Kidney Disease (GKD) accounts for 10% of adults with chronic kidney disease (1), with a monogenic cause being identified in around 20% of those with early onset chronic kidney disease (CKD) (2). Recent advances in genomic sequencing have enabled rapid and cost-effective sequencing of large amounts of DNA (3) via massively parallel sequencing, otherwise known as next generation sequencing (NGS). This in turn has led to better delineation of GKD, the identification of new renal disease genes and subsequent targets for therapy(4). Moreover, the clinical implementation of genomic testing has increased the number of patients receiving a timely and accurate genetic diagnosis(5). NGS-based genetic testing has demonstrated a monogenic cause in 20% of patients with early onset CKD, and almost 10% in an unselected cohort of 3000 adults with CKD(2, 6). A genomic diagnosis has many potential benefits including enabling targeted therapies(7-9), preventing the use of inappropriate treatments(10) and reducing the use of invasive diagnostic investigations such as renal biopsy. In addition to concluding a sometimes protracted diagnostic odyssey, a genomic diagnosis may also provide prognostic information, inform targeted surveillance for extra-renal complications and facilitate transplantation and reproductive planning. Despite these potential benefits, there is a paucity of comprehensive evaluations of clinical utility and health economic impact of genomic testing in kidney disease cohorts.

Multifaceted novel approaches are required to address the complexities of successfully implementing genomic technologies into clinical care. Diagnostic renal genetics clinics (RGC) apply a multidisciplinary team approach through collaboration between adult and paediatric nephrologists, clinical geneticists, genetic counsellors and diagnostic laboratory scientists. Whilst RGCs are operational in several countries, there is a lack of reported outcomes of this clinical model of care(5, 11).

The purpose of this study is to comprehensively determine the clinical utility and cost effectiveness of genomic testing in patients with suspected genetic kidney disease seen in a multidisciplinary RGC, and to compare this with their care and clinical diagnosis prior to referral. In addition, we aim to evaluate the value of a multidisciplinary RGC model from a patient perspective.

## STUDY AIMS

1. To determine the proportion of patients with suspected GKD who obtain a positive diagnosis following genomic testing compared with their clinical diagnosis prior to testing
2. To determine the clinical impact of genomic testing after three months follow-up in a cohort of patients with suspected GKD and identify subgroups of patients more likely to have a clinical impact following genomic testing
3. To determine whether genomic testing in a cohort of patients with suspected GKD is cost effective compared to usual care, and to identify whether genomic testing is cost effective for specific subgroups
4. To provide access to further research genomics participation for patients with suspected genetic kidney disease who remain undiagnosed following clinical genomic testing
5. To determine patient preferences regarding a service delivery model for a dedicated renal genetics service
6. To determine the value of genomic testing in those with suspected GKD from a patient perspective

## METHODS AND ANALYSIS

### Study design

This prospective observational study will be undertaken at multiple Australian sites that provide multidisciplinary renal genetics services. There are 16 participating sites throughout Australia (Figure 1). Patients who are referred by their treating physician to these multidisciplinary renal genetics clinics will be recruited over 4 years (Figure 2). Patients may be referred for testing for a variety of reasons. These include confirmation of a suspected diagnosis, exclusion of differential diagnoses, clarification of mode of inheritance, and for obtaining the diagnosis where one is previously unknown. For this reason, it was not possible to include a control arm, as this would prevent some patients from undergoing their usual clinical care. . In order to enable determination of comparative clinical utility, planned diagnostic investigations will be nominated by the recruiting clinicians. In addition, data regarding any changes in management will be collected from the referring nephrologist at three months following the return of genomic testing results.

1  
2  
3 Recruitment of a baseline cohort of 360 participants occurred between 2017 and 2018 (Figure  
4 3) and a further mutually exclusive replication cohort will be recruited between 2019 and  
5 2020. The replication cohort will have the same data collected but will also include patients  
6 with a prior genomic diagnosis. These patients will not participate in evaluation surveys  
7 (described below) but will be evaluated against all other outcome measures in order to further  
8 identify patient, disease and sub-cohort clinical outcomes enabled by larger scale and longer  
9 time span observation. The cohort of patients is anticipated to be ethnically diverse with a  
10 broad spectrum of renal phenotypes, clinical diagnoses and severity of kidney disease.  
11 Patients seen in a multidisciplinary renal genetics clinic as part of standard clinical care will  
12 be invited to participate in the study if there is consensus of opinion by the clinic team that  
13 their kidney disease is likely genetic in origin. Patients without a clear clinical indication for  
14 prospective clinical genomic testing will be excluded in the baseline cohort, including an  
15 existing molecularly confirmed genetic diagnosis and those with heterogeneous or complex  
16 diseases with a low or unlikely monogenic diagnosis rate by current genomic sequencing  
17 (such as isolated congenital abnormalities of the kidney and urinary tract (CAKUT)) (12).  
18 Patients who undergo only Sanger sequencing are excluded from the study as this would not  
19 represent a genomic approach to clinical investigation and may instead represent clarification  
20 or segregation of an already identified familial variant. Patients who attend a RGC but do not  
21 undergo genetic testing through the clinic are also excluded from the study. This includes  
22 patients who decline clinically-indicated testing. Informed consent, both for clinical genomic  
23 testing and participation in the research study will be obtained by the nominated clinical  
24 geneticist, nephrologist or genetic counsellor at each site.  
25  
26  
27  
28  
29  
30  
31  
32  
33  
34  
35  
36  
37  
38  
39  
40  
41  
42

### 43 **Participant Identifiers**

44 All participants will be assigned a unique identifier for the purposes of this study at  
45 recruitment. Study data will be collected and managed using REDCap(13) electronic data  
46 capture tools hosted at Murdoch Children's Research Institute. Access to patient identifying  
47 details is restricted to clinicians providing care and to those who need contact details for  
48 evaluation purposes..  
49  
50  
51  
52  
53

### 54 **Measures**

55 Once consented to the study, baseline demographic information, clinical information, and  
56 detailed phenotypic information will be recorded by clinicians in REDCap. Demographic  
57 data including age, gender, ethnicity, and English language status will be captured for all  
58  
59  
60

1  
2  
3 recruited patients. Further demographic information will be captured in patient surveys.  
4 Clinical data include suspected clinical diagnosis, comorbidities and types of specialists  
5 previously seen. A detailed family history and pedigree will be collected to identify the  
6 number of probands and at-risk relatives presenting for assessment. Comprehensive  
7 phenotypic information will also be collected including the presence of extra-renal features,  
8 renal impairment, urea and creatinine level, CKD stage, presence and details of hypertension,  
9 haematuria, proteinuria and biochemical/haematological abnormalities, results of imaging  
10 including ultrasound, CT and MRI, and results of renal biopsy if already performed. Data will  
11 also be collected regarding type of genomic test, outcomes of test and time taken to achieve  
12 diagnosis. Clinical diagnosis will be recorded as listed in the referral of each patient to a  
13 RGC, at the time of triaging for an RGC, prior to genomic testing and at the time of return of  
14 genomic testing results. This will enable comparison across multiple time points potentially  
15 leading up to a molecular genetic diagnosis.  
16  
17  
18  
19  
20  
21  
22  
23  
24  
25  
26

### 27 **Patient and Public Involvement**

28 The project was reviewed, edited and revised after in depth engagement with the Australian  
29 Genomic Health Alliance (AGHA) Consumer and Community Advisory group. Previous  
30 informal engagement with relevant representative local Australian kidney health patient  
31 organisations, including Polycystic Kidney Disease (PKD) Australia and Kidney Health  
32 Australia (KHA) also occurred. Results from this study will be published and be accessible to  
33 all patients on request.  
34  
35  
36  
37  
38  
39  
40

### 41 **Evaluation Surveys**

42 Evaluation surveys will be distributed to be completed either online or on paper. Adult and  
43 proxy versions are available (parent for child). Participants are asked to complete the first  
44 survey at 2-3 weeks after attending the RGC at which they are offered and consent to testing,  
45 and the second following their receipt of genomic test results. The surveys were developed  
46 based on existing surveys in use in the Melbourne Genomics Health Alliance.  
47  
48  
49  
50  
51  
52

53 The first survey (Table 1) captures additional demographic information and also includes  
54 questions about the experience of the consent process and views on the benefits of the  
55 multidisciplinary renal genetics clinic. The Genetic Counselling Outcomes Survey (14) is  
56 included in survey 1 and 2 to evaluate genetic counselling outcomes of the multidisciplinary  
57 clinic. Knowledge questions and a question on the likelihood of the test finding the cause of  
58  
59  
60

1  
2  
3 the kidney disease are included in survey 1 to gauge understanding. The first survey includes  
4 closed and open questions exploring hopes and expectations for testing. Willingness-to-pay  
5 questions designed specifically for this study are included in both surveys to gauge value.  
6  
7 Validated multi-attribute quality of life instruments (SF-12 for adults and parents(15),  
8  
9 CHU9D for children(16)) are included in surveys 1 and 2 to assess health related quality of  
10  
11 life. The PedsQL(17) family impact module is included in survey 1 and 2 for parents to  
12  
13 assess family impact. Both surveys include questions on family planning.  
14  
15

16  
17 In addition to the measures described above, the second survey includes study-specific  
18  
19 questions assessing understanding of the genomic results, impact this will have on the patient  
20  
21 and their family and perceived value of genomic testing. The Decision Regret scale(18) is  
22  
23 also included in survey 2.  
24  
25

### 26 **Sequencing**

27 Genomic sequencing will be undertaken and reported in clinically accredited laboratories. It  
28  
29 is envisaged that these are likely to include but not be limited to the National Association of  
30  
31 Testing Authorities accredited diagnostic laboratories at Children's Hospital at Westmead,  
32  
33 Victorian Clinical Genetics Service, Genome.One, SA Pathology and PathWest. The specific  
34  
35 clinical test requested for each participant will be selected by the treating clinician/s at the  
36  
37 attending renal genetics clinic according to clinical indication. The spectrum of genomic  
38  
39 testing that will be employed is anticipated to include targeted exome, whole exome and  
40  
41 whole genome sequencing, including the application of virtual gene panels based on patient  
42  
43 phenotype. When additional copy number variation assessment and/or variant confirmation is  
44  
45 indicated, then multiplex ligation-dependent probe application, chromosomal microarray or  
46  
47 Sanger sequencing may be undertaken in addition to genomic sequencing. The cost per test is  
48  
49 expected to be AUD\$1200 to AUD\$2400 depending upon the specific test and diagnostic  
50  
51 provider, with individual test costs to be ascertained directly. Further, each participant will  
52  
53 have genomic sequencing performed once unless technical or sequence quality issues require  
54  
55 re-sequencing to enable clinical reporting. Based on clinical indication, further analysis of  
56  
57 disease or phenotype-specific virtual gene panels may occur, with any such sequence re-  
58  
59 analysis being recorded.  
60

All participants will provide clinical consent for genomic testing and analysis will be  
restricted to the assessment of genes related to the condition of interest. In this instance,

1  
2  
3 analysis will be limited to a predefined gene list of 360 genes related to nephropathy((19).  
4 Secondary findings unrelated to the presenting condition will not be reported in this study.  
5 Consent for participation in the research study will be attained separately, which includes  
6 options to consent to accessing the Medicare Benefits Schedule (MBS) and Pharmaceutical  
7 Benefits scheme (PBS), hospital and emergency data sets and data sharing in addition to  
8 study evaluation data collection. The MBS and PBS are listings of all medical services and  
9 medicines subsidised by the Australian government, respectively. In addition, an optional  
10 consent will be obtained in order to share data and samples for use in ethically approved  
11 research outside of the study.  
12  
13  
14  
15  
16  
17  
18  
19

### 20 **Health economic evaluation**

21 An economic evaluation will be conducted to assess the incremental cost-effectiveness of  
22 NGS compared with usual care in patients with suspected kidney disease. A microsimulation  
23 model of disease progression will be developed to estimate the lifetime costs and outcomes  
24 associated with usual care and NGS. The analysis will be conducted from an Australian  
25 healthcare system perspective in line with recommended practices(20-22), and based on the  
26 outcomes of cost per additional diagnosis, cost per quality-adjusted life-year (QALY), and  
27 net monetary benefit.  
28  
29  
30  
31  
32  
33  
34  
35

36 Hospital patient-level resource use and cost data will be acquired for each study participant to  
37 cost the diagnostic and short-term medical management in the NGS arm. The additional per-  
38 patient diagnostic investigations that could potentially be incurred in the usual care pathway  
39 will be identified based on a review of national and international guidelines on the diagnosis  
40 of suspected kidney disease and clinical expertise from each of the 16 participating centres  
41 across Australia. The Australia and New Zealand Dialysis and Transplant Registry  
42 (ANZDATA) will be used to undertake a survival analysis of CKD patients. Parametric and  
43 non-parametric methods will be used to estimate transition probabilities for key endpoints  
44 including; all-cause mortality, initiation of dialysis and transplantation. This will allow for the  
45 development of evidence-based transition probabilities while controlling for patient-specific  
46 factors such as age, gender, treatment pathways and disease status. Unit costs associated with  
47 these endpoints and related treatments will be drawn from established national sources (23-  
48 25). A microsimulation will be used to capture the costs and benefits associated with earlier  
49 renal replacement therapy and delayed dialysis from the introduction of NGS. To accurately  
50  
51  
52  
53  
54  
55  
56  
57  
58  
59  
60

1  
2  
3 model the implications, registry-derived transition probabilities will be adjusted, on the basis  
4 of published evidence (26), to reflect the impact of new treatment pathways following NGS.  
5  
6  
7

8 For the cost-utility analysis, participants responses to the SF-12 measure will initially be used  
9 to generate utilities at baseline prior to NGS and following the return of NGS findings. A  
10 review of the literature will be undertaken to complement these estimates with evidence from  
11 secondary sources, such as utilities for chronic kidney disease (27) and renal transplantation  
12 (28). The cost-benefit analysis will rely on a contingent valuation exercise that was  
13 undertaken to understand the personal value of NGS to the families. Deterministic and  
14 probabilistic sensitivity analyses will be undertaken to explore the robustness of the findings  
15 to plausible variations in key assumptions around costs, outcomes and transition probabilities,  
16 and to consider the broader issue of generalisability of the study's results. Cost-effectiveness  
17 acceptability curves will be generated to reflect decision uncertainty.  
18  
19  
20  
21  
22  
23  
24  
25  
26

### 27 **Study outcomes**

28 The primary outcome will be the proportion of patients who receive a molecular diagnosis via  
29 genomic testing (diagnostic rate). Secondary outcomes will be change in clinical diagnosis  
30 following genomic testing, change in clinical management following genomic testing and cost-  
31 effectiveness of genomic testing compared to non-genomic diagnostic investigations. Survey  
32 outcomes will include the proportion of patients who preferred to be seen by the  
33 multidisciplinary team compared to those who prefer to be seen in individual clinics. In  
34 addition, the GCOS will be compared before and after testing and between those with a  
35 positive/negative genomic testing result.  
36  
37  
38  
39  
40  
41  
42  
43  
44

### 45 **Data analysis**

46 Results on diagnostic utility and clinical implications will be expressed as frequencies and  
47 percentages for categorical variables and be compared using the chi-square test. Continuous  
48 non-normally distributed variables will be expressed as median (IQR) and compared using  
49 the Mann-Whitney test. Normally distributed continuous variables will be expressed as  
50 mean±SD and compared using the Student's t-test. Multivariable logistic regression will be  
51 performed to determine which variables may predict a positive genomic diagnosis, such as  
52 age of onset of CKD, aetiology of CKD, family history or presence of  
53 haematuria/proteinuria/cysts. This will help to develop professional guidelines regarding  
54 genomic testing in suspected GKD. In addition, the diagnostic rates between different  
55  
56  
57  
58  
59  
60



1  
2  
3 genomic testing modalities will also be compared. The target sample size is 500 patients  
4 across both baseline and replication cohorts.  
5  
6  
7

## 8 **DISCUSSION**

9  
10 In this protocol, we describe the rationale and methods for a prospective observational study  
11 of a national cohort of patients with suspected genetic renal disease that are referred to  
12 multidisciplinary renal genetics clinics throughout Australia. The strengths of this study are  
13 the multicentre design, prospective data collection and a real-world clinical setting. The  
14 absence of a control arm is a limitation of this study however it was not feasible to randomize  
15 patients in this study for two reasons.. Firstly, genomic testing is clinically indicated and  
16 performed routinely in most participating states/centres, and it would therefore be unethical  
17 to deny genomic testing to some patients where it is clinically indicated and current standard  
18 of care. Secondly, feedback from patient representatives, the community and genetic  
19 counsellors highlighted that it was unacceptable to deny testing to some patients for the  
20 purpose of a control arm.. Further those patients not receiving a genomic test after clinical  
21 assessment are likely to do so in a non-random fashion thus precluding their analysis as a true  
22 control group.  
23  
24  
25  
26  
27  
28  
29  
30  
31  
32  
33

34 Genomic technologies have transformed the concept of precision medicine in many  
35 specialities, however the potential benefits in kidney medicine are yet to be demonstrated.  
36 Until now, the diagnostic utility of genomic testing has been assessed in a small number of  
37 patients or in a research context (29, 30). In addition, while studies which perform genomic  
38 sequencing in larger cohorts (6, 31) are emerging, detailed phenotypic information is not  
39 being collected and there remains a paucity of data on clinical outcomes. Importantly, these  
40 large-scale studies include patients with all types of chronic kidney disease and are thus  
41 powered to understand prevalence of GKD rather than to determine utility and yield in a  
42 cohort in which the clinician suspects genetic disease(6). Data on genomic sequencing in a  
43 real-world clinical environment at a national scale for a targeted population of patients with  
44 suspected GKD are lacking and the health economic impacts of genomic testing are not well  
45 understood or established(32). We believe that collecting such detailed information from a  
46 prospectively ascertained cohort will enable us to determine the diagnostic yield and  
47 comprehensive clinical implications, to inform future practice recommendations.  
48  
49  
50  
51  
52  
53  
54  
55  
56  
57  
58  
59  
60

1  
2  
3 To our knowledge, this is the first time that a structured, objective and minimally bias  
4 approach is undertaken to measure the outcomes of genomic testing in kidney disease.  
5 Results from this study will provide the opportunity to determine the clinical implications of  
6 genomic testing in a large cohort of patients, and further enable analysis of which subgroups  
7 of patients may benefit most. Furthermore, due to the pragmatic nature of this study, these  
8 results more likely to be replicated in a clinical environment. By assessing the utility, cost  
9 effectiveness and implementation aspects of genomic testing in patients with kidney disease,  
10 the results of this study will inform patients, treating physicians and health services and  
11 define priorities for future trials. Collectively, this is anticipated to have significant impacts  
12 upon clinical practice and health service redesign.  
13  
14  
15  
16  
17  
18  
19  
20  
21

## 22 **FUNDING STATEMENT**

23  
24 Operating as the KidGen Renal Genetics Flagship, this work was supported by the Melbourne  
25 Genomics Health Alliance (Melbourne Genomics) and grants from the Royal Children's  
26 Hospital Foundation and by the NHMRC Genomics TCR Grant 1113531, entitled Preparing  
27 Australia for Genomic Medicine: A proposal by the Australian Genomics Health Alliance.  
28 Melbourne Genomics is funded by the 10 members and the State Government of Victoria  
29 (Department of Health and Humans Services). In kind funding support was provided for renal  
30 genetics clinic operation and genomic test provision by Queensland Health (Metro North  
31 Hospital and Health Service; Children's Health Queensland Hospital and Health Service),  
32 New South Wales Health, South Australia Health, Western Australia Department of Health,  
33 Northern Territory Department of Health and Tasmanian Department of Health and Human  
34 Services.  
35  
36  
37  
38  
39  
40  
41  
42  
43  
44

## 45 **ETHICS AND DISSEMINATION**

### 46 **Ethics**

47  
48 Ethics approval for this project has been obtained by Australian Genomics Health Alliance as  
49 part of the research study Australian Genomics Health Alliance: Preparing Australia for  
50 Genomic Medicine and issued by Melbourne Health HREC/16/MH/251. Governance site  
51 specific approval for the project has been obtained for each of the participating clinic sites.  
52 All participants will provide informed consent for data collection and to undergo clinically  
53 relevant genetic/genomic testing.  
54  
55  
56  
57  
58  
59  
60

## Dissemination Plan

The main findings of this study will be published in peer-reviewed journals and will also be presented at national and international conferences. We will also issue reports of results of the study to the Australian Government, State/Territory Governments and health organizations in order to inform future policy and guidelines. This study will also contribute to the training and development of post-doctoral students.

## CONTRIBUTOR SHIP STATEMENT

KJ contributed to the design of the study and drafted the manuscript. CQ and AJM (Andrew John Mallett) conceived the project and obtained funding for the clinical flagships and research study, made substantial contributions to the design of the study and were major contributors in drafting the manuscript. LW and ZS undertook significant project design and data management elements, provided specific design elements around outcome analysis and were major contributors in drafting the manuscript. IG, YW and MM provided specific design elements around health economic analysis. SB provided specific implementation design elements. AM (Amali Mallawaarachchi), HM, RF, AC, MS, MJ, PK and CP contributed to regionalised study design and implementation. All authors contributed to the drafting of the manuscript, read and approved the final manuscript. In addition to the authors listed, the broader KidGen Collaborative scientific, clinical and diagnostic membership had input into this protocol.

**COMPETING INTERESTS:** No, there are no competing interests for any author

## REFERENCES

1. Mallett A, Patel C, Salisbury A, Wang Z, Healy H, Hoy W. The prevalence and epidemiology of genetic renal disease amongst adults with chronic kidney disease in Australia. *Orphanet Journal of Rare Diseases*. 2014;9:98-.
2. Vivante A, Hildebrandt F. Exploring the genetic basis of early-onset chronic kidney disease. *Nature Reviews Nephrology*. 2016;12(3):133-46.
3. Rabbani B, Mahdiah N, Hosomichi K, Nakaoka H, Inoue I. Next-generation sequencing: impact of exome sequencing in characterizing Mendelian disorders. *Journal of human genetics*. 2012;57(10):621-32.
4. Groopman EE, Rasouly HM, Gharavi AG. Genomic medicine for kidney disease. *Nature reviews Nephrology*. 2018;14(2):83-104.
5. Mallett A, Fowles LF, McGaughran J, Healy H, Patel C. A multidisciplinary renal genetics clinic improves patient diagnosis. *Med J Aust*. 2016;204(2):58-9.
6. Groopman EE, Marasa M, Cameron-Christie S, Petrovski S, Aggarwal VS, Milo-Rasouly H, et al. Diagnostic Utility of Exome Sequencing for Kidney Disease. *The New England journal of medicine*. 2018.
7. Bresin E, Daina E, Noris M, Castelletti F, Stefanov R, Hill P, et al. Outcome of renal transplantation in patients with non-Shiga toxin-associated hemolytic uremic syndrome: prognostic significance of genetic background. *Clin J Am Soc Nephrol*. 2006;1(1):88-99.
8. Sellier-Leclerc AL, Fremeaux-Bacchi V, Dragon-Durey MA, Macher MA, Niaudet P, Guest G, et al. Differential impact of complement mutations on clinical characteristics in atypical hemolytic uremic syndrome. *J Am Soc Nephrol*. 2007;18(8):2392-400.
9. Gross O, Licht C, Anders HJ, Hoppe B, Beck B, Tonshoff B, et al. Early angiotensin-converting enzyme inhibition in Alport syndrome delays renal failure and improves life expectancy. *Kidney Int*. 2012;81(5):494-501.
10. Varner JD, Chryst-Stangl M, Esezobor CI, Solarin A, Wu G, Lane B, et al. Genetic Testing for Steroid-Resistant-Nephrotic Syndrome in an Outbred Population. *Frontiers in pediatrics*. 2018;6:307.
11. Alkanderi S, Yates LM, Johnson SA, Sayer JA. Lessons learned from a multidisciplinary renal genetics clinic. *Qjm*. 2017;110(7):453-7.
12. Nicolaou N, Pulit SL, Nijman IJ, Monroe GR, Feitz WF, Schreuder MF, et al. Prioritization and burden analysis of rare variants in 208 candidate genes suggest they do not play a major role in CAKUT. *Kidney international*. 2016;89(2):476-86.
13. Harris PA, Taylor R, Thielke R, Payne J, Gonzalez N, Conde JG. Research electronic data capture (REDCap)--a metadata-driven methodology and workflow process for providing translational research informatics support. *J Biomed Inform*. 2009;42(2):377-81.
14. McAllister M, Wood AM, Dunn G, Shiloh S, Todd C. The Genetic Counseling Outcome Scale: a new patient-reported outcome measure for clinical genetics services. *Clin Genet*. 2011;79(5):413-24.
15. Brazier JE, Roberts J. The estimation of a preference-based measure of health from the SF-12. *Med Care*. 2004;42(9):851-9.
16. Furber G, Segal L. The validity of the Child Health Utility instrument (CHU9D) as a routine outcome measure for use in child and adolescent mental health services. *Health and quality of life outcomes*. 2015;13:22.
17. Glascoe FP. Using parents' concerns to detect and address developmental and behavioral problems. *Journal of the Society of Pediatric Nurses : JSPN*. 1999;4(1):24-35.
18. Brehaut JC, O'Connor AM, Wood TJ, Hack TF, Siminoff L, Gordon E, et al. Validation of a decision regret scale. *Medical decision making : an international journal of the Society for Medical Decision Making*. 2003;23(4):281-92.

19. Little MH, Quinlan C. Advances in our understanding of genetic kidney disease using kidney organoids. *Pediatric nephrology* (Berlin, Germany). 2019.
20. Husereau D, Drummond M, Petrou S, Carswell C, Moher D, Greenberg D, et al. Consolidated Health Economic Evaluation Reporting Standards (CHEERS)--explanation and elaboration: a report of the ISPOR Health Economic Evaluation Publication Guidelines Good Reporting Practices Task Force. *Value in health : the journal of the International Society for Pharmacoeconomics and Outcomes Research*. 2013;16(2):231-50.
21. Philips Z, Ginnelly L, Sculpher M, Claxton K, Golder S, Riemsma R, et al. Review of guidelines for good practice in decision-analytic modelling in health technology assessment 2004. iii-iv, ix p.
22. Committee PBA. Guidelines for preparing submissions to the Pharmaceutical Benefits Advisory Committee. In: Health AGDo, editor. 5.0 ed. Canberra: Australian Government Department of Health; 2016.
23. Australia M. Medicare Australia. Pharmaceutical Benefits Schedule item reports. Health Insurance Commission; 2018.
24. Australia M. Medicare Benefits Schedule (MBS) item statistics reports. Health Insurance Commission; 2018.
25. Government A. National Hospital Cost Data Collection Cost Report Round 20 (2015-2016). Report. Canberra, Australia 2015-2016.
26. ANZDATA. The 40th Annual Report: ANZDATA Registry Report. Adelaide: Australia and New Zealand Dialysis and Transplant Registry; 2017.
27. Gorodetskaya I, Zenios S, McCulloch CE, Bostrom A, Hsu CY, Bindman AB, et al. Health-related quality of life and estimates of utility in chronic kidney disease. *Kidney international*. 2005;68(6):2801-8.
28. Laupacis A, Keown P, Pus N, Krueger H, Ferguson B, Wong C, et al. A study of the quality of life and cost-utility of renal transplantation. *Kidney international*. 1996;50(1):235-42.
29. Sadowski CE, Lovric S, Ashraf S, Pabst WL, Gee HY, Kohl S, et al. A single-gene cause in 29.5% of cases of steroid-resistant nephrotic syndrome. *J Am Soc Nephrol*. 2015;26(6):1279-89.
30. Heidet L, Moriniere V, Henry C, De Tomasi L, Reilly ML, Humbert C, et al. Targeted Exome Sequencing Identifies PBX1 as Involved in Monogenic Congenital Anomalies of the Kidney and Urinary Tract. *J Am Soc Nephrol*. 2017;28(10):2901-14.
31. Lata S, Marasa M, Li Y, Fasel DA, Groopman E, Jobanputra V, et al. Whole-Exome Sequencing in Adults With Chronic Kidney Disease: A Pilot Study. *Ann Intern Med*. 2018;168(2):100-9.
32. Schwarze K, Buchanan J, Taylor JC, Wordsworth S. Are whole-exome and whole-genome sequencing approaches cost-effective? A systematic review of the literature. *Genet Med*. 2018.

1  
2  
3  
4  
5  
6  
7  
8  
9  
10  
11  
12  
13  
14  
15  
16  
17  
18  
19  
20  
21  
22  
23  
24  
25  
26  
27  
28  
29  
30  
31  
32  
33  
34  
35  
36  
37  
38  
39  
40  
41  
42  
43  
44  
45  
46  
47  
48  
49  
50  
51  
52  
53  
54  
55  
56  
57  
58  
59  
60

**TABLES**
**Table 1.** Summary of survey measures

| Measure                                    | Description                                                                                                                                                                                           | S1 | S2 |
|--------------------------------------------|-------------------------------------------------------------------------------------------------------------------------------------------------------------------------------------------------------|----|----|
| Demographics                               | Age, gender, marital status, education, income, number of dependents in household, postcode, private health insurance status.                                                                         | X  |    |
| Patient reported outcomes measures         | CHU9D[ref] and PEDS family impact[ref] for paediatric surveys<br>OR<br>SF-12 [ref] for adult surveys                                                                                                  | X  | X  |
| Experience of the multidisciplinary clinic | Three study specific questions exploring advantages and disadvantages of multidisciplinary renal genetics clinics                                                                                     | X  | X  |
| Genetic counselling                        | 24-item scale measuring outcomes of genetic counselling GCOS-24[ref]                                                                                                                                  | X  | X  |
| Family planning                            | Four study specific questions addressing plans for another child, estimated recurrence of the kidney condition, concern about recurrence, interest in reproductive technologies (parent surveys only) | X  |    |

|                            |                                                                                                                                                                                                                                                                                                                                                               |   |   |
|----------------------------|---------------------------------------------------------------------------------------------------------------------------------------------------------------------------------------------------------------------------------------------------------------------------------------------------------------------------------------------------------------|---|---|
| Understanding              | In survey 1, 8 study specific questions address participant understanding of: types of potential results (4 questions), potential familial implications (1 question), ways in which the data can be used (2 questions); number of genes examined (1 question).<br>In survey 2, 2 study specific questions used to measure recall and understanding of result. | X | X |
| Willingness to pay (value) | Study specific questions included to establish a quantitative reference for the value placed on testing                                                                                                                                                                                                                                                       | X | X |
| Information provision      | Study specific questions to assess participant perception about the way in which information (3 items – S1) and results (3 items – S2) were provided                                                                                                                                                                                                          | X | X |
| Hopes/<br>Expectation      | Eight study specific questions exploring participants reasons for agreeing to the test, rated on a 5 point scale as extremely unimportant to extremely important                                                                                                                                                                                              | X |   |
| Likelihood                 | One study specific question to determine participant's perception of the likelihood testing will find the cause of the condition .                                                                                                                                                                                                                            | X |   |
| Decision regret            | 5 item scale measuring distress or remorse after a (health care) decision [ref O'Connor]                                                                                                                                                                                                                                                                      |   | X |
| Value of the test          | Eleven study specific questions exploring the value to participants of having had the test rated on a 4 point scale as not valuable to extremely valuable or not applicable                                                                                                                                                                                   |   | X |

|                    |                                                                                     |  |   |
|--------------------|-------------------------------------------------------------------------------------|--|---|
| Impact of the test | Two study specific questions asking about the impact of the test on family planning |  | X |
|--------------------|-------------------------------------------------------------------------------------|--|---|

## FIGURES

**Figure 1.** Participating Renal Genetics Clinics

**Figure 2.** Patient flow within a KidGen Renal Genetics Clinic

**Figure 3.** Recruitment workflow within the KidGen Renal Genetics Clinic network



1  
2  
3  
4  
5  
6  
7  
8  
9  
10  
11  
12  
13  
14  
15  
16  
17  
18  
19  
20  
21  
22  
23  
24  
25  
26  
27  
28  
29  
30  
31  
32  
33  
34  
35  
36  
37  
38  
39  
40  
41  
42  
43  
44  
45  
46  
47  
48  
49  
50  
51  
52  
53  
54  
55  
56  
57  
58  
59  
60



Figure 1. Participating Renal Genetics Clinics

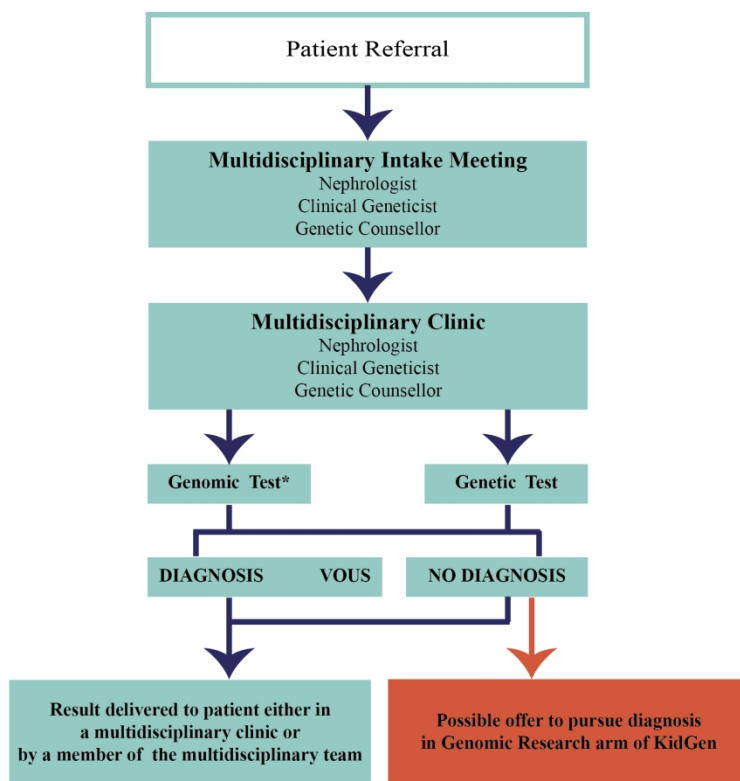

\* Prior to reporting results may be interpreted at a MDT by clinicians and laboratory scientists.

Figure 2. Patient flow within a KidGen Renal Genetics Clinic

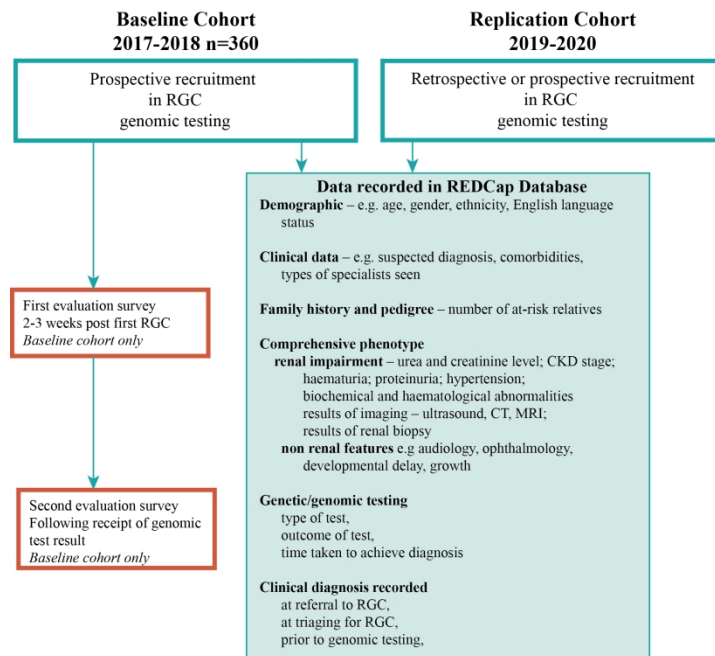

Figure 3. Recruitment workflow within the KidGen Renal Genetics Clinic network

# BMJ Open

## The comprehensive evaluation of a prospective Australian patient cohort with suspected genetic kidney disease undergoing clinical genomic testing- a study protocol

|                               |                                                                                                                                                                                                                                                                                                                                                                                                                                                                                                                                                                                                                                                                                                                                                                                                                                                                                                                                                                                                                                                                                                                                                                                                                                                                                                                                                                                                                                                                                                                                                                                                                                                                                                                                                                                                                                                                                                                                                                                                                                                                                                                                                                                                                                                                                                                                                                       |
|-------------------------------|-----------------------------------------------------------------------------------------------------------------------------------------------------------------------------------------------------------------------------------------------------------------------------------------------------------------------------------------------------------------------------------------------------------------------------------------------------------------------------------------------------------------------------------------------------------------------------------------------------------------------------------------------------------------------------------------------------------------------------------------------------------------------------------------------------------------------------------------------------------------------------------------------------------------------------------------------------------------------------------------------------------------------------------------------------------------------------------------------------------------------------------------------------------------------------------------------------------------------------------------------------------------------------------------------------------------------------------------------------------------------------------------------------------------------------------------------------------------------------------------------------------------------------------------------------------------------------------------------------------------------------------------------------------------------------------------------------------------------------------------------------------------------------------------------------------------------------------------------------------------------------------------------------------------------------------------------------------------------------------------------------------------------------------------------------------------------------------------------------------------------------------------------------------------------------------------------------------------------------------------------------------------------------------------------------------------------------------------------------------------------|
| Journal:                      | <i>BMJ Open</i>                                                                                                                                                                                                                                                                                                                                                                                                                                                                                                                                                                                                                                                                                                                                                                                                                                                                                                                                                                                                                                                                                                                                                                                                                                                                                                                                                                                                                                                                                                                                                                                                                                                                                                                                                                                                                                                                                                                                                                                                                                                                                                                                                                                                                                                                                                                                                       |
| Manuscript ID                 | bmjopen-2019-029541.R2                                                                                                                                                                                                                                                                                                                                                                                                                                                                                                                                                                                                                                                                                                                                                                                                                                                                                                                                                                                                                                                                                                                                                                                                                                                                                                                                                                                                                                                                                                                                                                                                                                                                                                                                                                                                                                                                                                                                                                                                                                                                                                                                                                                                                                                                                                                                                |
| Article Type:                 | Protocol                                                                                                                                                                                                                                                                                                                                                                                                                                                                                                                                                                                                                                                                                                                                                                                                                                                                                                                                                                                                                                                                                                                                                                                                                                                                                                                                                                                                                                                                                                                                                                                                                                                                                                                                                                                                                                                                                                                                                                                                                                                                                                                                                                                                                                                                                                                                                              |
| Date Submitted by the Author: | 17-Jul-2019                                                                                                                                                                                                                                                                                                                                                                                                                                                                                                                                                                                                                                                                                                                                                                                                                                                                                                                                                                                                                                                                                                                                                                                                                                                                                                                                                                                                                                                                                                                                                                                                                                                                                                                                                                                                                                                                                                                                                                                                                                                                                                                                                                                                                                                                                                                                                           |
| Complete List of Authors:     | <p>Jayasinghe, Kushani; Monash Health, Nephrology; Monash University, Medicine</p> <p>Stark, Zornitza; Australian Genomics Health Alliance, Australian Genomics Health Alliance; Murdoch Children's Research Institute</p> <p>Patel, Chirag; Royal Brisbane and Women's Hospital; KidGen Collaborative and Renal Genetics Flagships</p> <p>Mallawaarachchi, Amali; Australian Genomics Health Alliance, Australian Genomics Health Alliance; Royal Prince Alfred Hospital</p> <p>McCarthy, Hugh; Australian Genomics Health Alliance, Australian Genomics Health Alliance; Sydney Children's Hospitals Network</p> <p>Faull, Randall; Royal Adelaide Hospital; Australian Genomics Health Alliance, Australian Genomics Health Alliance</p> <p>Chakera, Aron; Sir Charles Gairdner Hospital, Nephrology and Renal Transplantation; Australian Genomics Health Alliance, Australian Genomics Health Alliance</p> <p>Sundaram, Madhivanan; Australian Genomics Health Alliance, Australian Genomics Health Alliance; Royal Darwin Hospital</p> <p>Jose, Matthew; University of Tasmania School of Medicine, ; Royal Hobart Hospital</p> <p>Kerr, Peter; Monash Medical Centre, Nephrology; Monash University, Medicine</p> <p>Wu, You; Australian Genomics Health Alliance, Australian Genomics Health Alliance; University of Melbourne, Health Economics Unit, Centre for Health Policy</p> <p>Wardrop, Louise; Australian Genomics Health Alliance, Australian Genomics Health Alliance; Murdoch Children's Research Institute</p> <p>Goranitis, I; Australian Genomics Health Alliance, Australian Genomics Health Alliance; University of Melbourne, Health Economics Unit, Centre for Health Policy</p> <p>Best, Stephanie; Australian Institute of Health Innovation, Centre for Healthcare Resilience and Implementation Science, Macquarie University; Murdoch Children's Research Institute, Australian Genomics</p> <p>Martyn, Melissa; Melbourne Genomics Health Alliance; Murdoch Children's Research Institute, Genetics Education and Health Research</p> <p>Quinlan, Catherine; Melbourne Genomics Health Alliance; Royal Children's Hospital, Department of Paediatric Nephrology</p> <p>Mallett, Andrew; Australian Genomics Health Alliance, Australian Genomics Health Alliance; Royal Brisbane and Women's Hospital, Genetic Health Queensland</p> |

1  
2  
3  
4  
5  
6  
7  
8  
9  
10  
11  
12  
13  
14  
15  
16  
17  
18  
19  
20  
21  
22  
23  
24  
25  
26  
27  
28  
29  
30  
31  
32  
33  
34  
35  
36  
37  
38  
39  
40  
41  
42  
43  
44  
45  
46  
47  
48  
49  
50  
51  
52  
53  
54  
55  
56  
57  
58  
59  
60

|                                  |                                                                                            |
|----------------------------------|--------------------------------------------------------------------------------------------|
| <b>Primary Subject Heading</b> : | Genetics and genomics                                                                      |
| Secondary Subject Heading:       | Renal medicine                                                                             |
| Keywords:                        | Chronic renal failure < NEPHROLOGY, genetic kidney disease, GENETICS, genomics, NEPHROLOGY |
|                                  |                                                                                            |

SCHOLARONE™  
Manuscripts

1  
2  
3 **The comprehensive evaluation of a prospective Australian patient cohort with suspected**  
4 **genetic kidney disease undergoing clinical genomic testing- a study protocol**

5 Kushani Jayasinghe<sup>1,2,3,4,5</sup>, Zornitza Stark<sup>3,5,6</sup>, Chirag Patel<sup>3,7</sup>, Amali Mallawaarachchi<sup>3,8,9</sup>,  
6 Hugh J McCarthy<sup>3,10,11</sup>, Randall Faull<sup>3,12</sup>, Aron Chakera<sup>3,13</sup>, Madhivanan Sundaram<sup>3,14</sup>,  
7 Matthew D. Jose<sup>3,15,16</sup>, Peter G Kerr<sup>1,2,4</sup>, You Wu<sup>3,5,17</sup>, Louise Wardrop<sup>3,4,5</sup>, Ilias  
8 Goranitis<sup>3,5,17</sup>, Stephanie Best<sup>3,5,18</sup>, Melissa Martyn<sup>4,5,6</sup>, Catherine Quinlan<sup>3,4,5,6,19\*</sup> and  
9 Andrew Mallett<sup>3,5,20,21\*</sup> on behalf of the KidGen Collaborative

10  
11  
12  
13  
14  
15  
16  
17 <sup>1</sup>Department of Nephrology, Monash Medical Centre, Melbourne, Australia

18 <sup>2</sup>Monash University, Melbourne, Australia

19 <sup>3</sup>Australian Genomics Health Alliance, Australia

20 <sup>4</sup>Melbourne Genomics Health Alliance, Australia

21 <sup>5</sup>Murdoch Children's Research Institute, Melbourne, Australia

22 <sup>6</sup>Department of Paediatrics, University of Melbourne, Australia

23 <sup>7</sup>Genetic Health Queensland, Royal Brisbane and Women's Hospital, Brisbane, Australia

24 <sup>8</sup>Department of Medical Genomics, Royal Prince Alfred Hospital, Sydney, Australia

25 <sup>9</sup>Garvan Institute of Medical Research, Sydney, Australia

26 <sup>10</sup>Sydney Children's Hospitals Network, Sydney, Australia

27 <sup>11</sup>Children's Hospital Westmead Clinical School, University of Sydney, Australia

28 <sup>12</sup>Royal Adelaide Hospital, Adelaide, Australia

29 <sup>13</sup>Sir Charles Gairdner Hospital, Perth, Australia

30 <sup>14</sup>Royal Darwin Hospital, Darwin, Australia

31 <sup>15</sup>Royal Hobart Hospital, Hobart, Australia

32 <sup>16</sup>School of Medicine, University of Tasmania

33 <sup>17</sup>Health Economics Unit, Centre for Health Policy, University of Melbourne, Melbourne,  
34 Australia

35 <sup>18</sup>Centre for Healthcare Resilience and Implementation Science, Australian Institute of Health  
36 Innovation, Macquarie University, Sydney, Australia,

37 <sup>19</sup>Department of Paediatric Nephrology, Royal Children's Hospital, Melbourne, Australia

38 <sup>20</sup>Kidney Health Service and Conjoint Renal Research Laboratory, Royal Brisbane and  
39 Women's Hospital, Brisbane, Australia

40 <sup>21</sup>Institute for Molecular Bioscience and Faculty of Medicine, The University of Queensland,  
41 Brisbane, Australia

1  
2  
3 \* contributed equally  
4  
5  
6

7 **Running Head:** A protocol for comprehensive evaluation of genomic testing in nephrology

8 **Abstract Word Count:** 271

9 **Manuscript Word Count:** 3043

10 **Corresponding Author:**

11 Andrew J. Mallett

12 Email: Andrew.mallett@health.qld.gov.au

13 Address: Department of Renal Medicine, Level 9 Ned Hanlon Building, Royal Brisbane and  
14 Women's Hospital, Butterfield Street, Herston, Queensland 4029, Australia

15 Phone number: +61 (0)7 3636 8111

16 Fax number: +61 (0)7 3646 1560  
17  
18  
19  
20  
21  
22  
23  
24  
25  
26  
27  
28  
29  
30  
31  
32  
33  
34  
35  
36  
37  
38  
39  
40  
41  
42  
43  
44  
45  
46  
47  
48  
49  
50  
51  
52  
53  
54  
55  
56  
57  
58  
59  
60

## ABSTRACT

### Introduction

Recent advances in genomic technology have allowed better delineation of renal conditions, the identification of new kidney disease genes and subsequent targets for therapy. To date however, the utility of genomic testing in a clinically ascertained, prospectively recruited kidney disease cohort remains unknown. The aim of this study is to explore the clinical utility and cost effectiveness of genomic testing within a national cohort of patients with suspected genetic kidney disease who attend multidisciplinary renal genetics clinics.

### Methods and Analysis

This is a prospective observational cohort study performed at 16 centres throughout Australia. Patients will be included if they are referred to one of the multidisciplinary renal genetics clinics and are deemed likely to have a genetic basis to their kidney disease by the multidisciplinary renal genetics team. The expected cohort consists of 360 adult and paediatric patients recruited by December 2018 with ongoing validation cohort of 140 patients who will be recruited until June 2020. The primary outcome will be the proportion of patients who receive a molecular diagnosis via genomic testing (diagnostic rate) compared to usual care. Secondary outcomes will include change in clinical diagnosis following genomic testing, change in clinical management following genomic testing, and the cost-effectiveness of genomic testing compared to usual care.

### Ethics and dissemination

The project has received ethics approval from the Melbourne Health Human Research Ethics Committee as part of the Australian Genomics Health Alliance protocol: HREC/16/MH/251. All participants will provide written informed consent for data collection and to undergo clinically relevant genetic/genomic testing. The results of this study will be published in peer-reviewed journals and will also be presented at national and international conferences.



## STRENGTHS AND LIMITATIONS

- This is a prospectively conducted multicenter national study in which patient data will be captured in a pragmatic clinical setting
- Patients will be recruited for clinically indicated genomic testing for suspected genetic kidney disorders, which may allow better generalizability of results
- Genomic testing is clinically indicated and performed routinely in some participating states/centres in Australia, and therefore it would be unethical to have a control arm for comparison as this would deny some patients of testing.
- This study will contribute to the future research and clinical service redesign by establishing the utility of genomic testing in a kidney disease cohort from patient, clinician and health resource perspectives

## INTRODUCTION

Genetic Kidney Disease (GKD) accounts for 10% of adults with chronic kidney disease (1), with a monogenic cause being identified in around 20% of those with early onset chronic kidney disease (CKD) (2). Recent advances in genomic sequencing have enabled rapid and cost-effective sequencing of large amounts of DNA (3) via massively parallel sequencing, otherwise known as next generation sequencing (NGS). This in turn has led to better delineation of GKD, the identification of new renal disease genes and subsequent targets for therapy(4). Moreover, the clinical implementation of genomic testing has increased the number of patients receiving a timely and accurate genetic diagnosis(5). NGS-based genetic testing has demonstrated a monogenic cause in 20% of patients with early onset CKD, and almost 10% in an unselected cohort of 3000 adults with CKD(2, 6). A genomic diagnosis has many potential benefits including enabling targeted therapies(7-9), preventing the use of inappropriate treatments(10) and reducing the use of invasive diagnostic investigations such as renal biopsy. In addition to concluding a sometimes protracted diagnostic odyssey, a genomic diagnosis may also provide prognostic information, inform targeted surveillance for extra-renal complications and facilitate transplantation and reproductive planning. Despite these potential benefits, there is a paucity of comprehensive evaluations of clinical utility and health economic impact of genomic testing in kidney disease cohorts.

Multifaceted novel approaches are required to address the complexities of successfully implementing genomic technologies into clinical care. Diagnostic renal genetics clinics (RGC) apply a multidisciplinary team approach through collaboration between adult and paediatric nephrologists, clinical geneticists, genetic counsellors and diagnostic laboratory scientists. Whilst RGCs are operational in several countries, there is a lack of reported outcomes of this clinical model of care(5, 11).

The purpose of this study is to comprehensively determine the clinical utility and cost effectiveness of genomic testing in patients with suspected genetic kidney disease seen in a multidisciplinary RGC, and to compare this with their care and clinical diagnosis prior to referral. In addition, we aim to evaluate the value of a multidisciplinary RGC model from a patient perspective.

## STUDY AIMS

1. To determine the proportion of patients with suspected GKD who obtain a positive diagnosis following genomic testing compared with their clinical diagnosis prior to testing
2. To determine the clinical impact of genomic testing after three months follow-up in a cohort of patients with suspected GKD and identify subgroups of patients who are more likely to have a clinical impact following genomic testing
3. To determine whether genomic testing in a cohort of patients with suspected GKD is cost effective compared to usual care, and to identify whether genomic testing is cost effective for specific subgroups
4. To provide access to further research genomics participation for patients with suspected genetic kidney disease who remain undiagnosed following clinical genomic testing
5. To determine patient preferences regarding a service delivery model for a dedicated renal genetics service
6. To determine the value of genomic testing in those with suspected GKD from a patient perspective

## METHODS AND ANALYSIS

### Study design

This prospective observational study will be undertaken at multiple Australian sites that provide multidisciplinary renal genetics services. There are 16 participating sites throughout Australia (Figure 1). Patients who are referred by their treating physician to these multidisciplinary renal genetics clinics will be recruited over four years (Figure 2). Patients may be referred for testing for a variety of reasons. These include confirmation of a suspected diagnosis, exclusion of differential diagnoses, clarification of mode of inheritance, and for obtaining the diagnosis where one is previously unknown. For this reason, it was not possible to include a control arm, as this would prevent some patients from undergoing their usual clinical care. In order to enable determination of comparative clinical utility, planned diagnostic investigations will be nominated by the recruiting clinicians. In addition, data regarding any changes in management will be collected from the referring nephrologist at three months following the return of genomic testing results.

1  
2  
3 Recruitment of a baseline cohort of 360 participants occurred between 2017 and 2018 (Figure  
4 3) and a further mutually exclusive replication cohort will be recruited between 2019 and  
5 2020. The replication cohort will have the same data collected but will also include patients  
6 with a prior genomic diagnosis. These patients will not participate in evaluation surveys  
7 (described below) but will be evaluated against all other outcome measures in order to further  
8 identify patient, disease and sub-cohort clinical outcomes enabled by larger scale and longer  
9 time span observation. The cohort of patients is anticipated to be ethnically diverse with a  
10 broad spectrum of renal phenotypes, clinical diagnoses and severity of kidney disease.

11 Patients seen in a multidisciplinary renal genetics clinic as part of standard clinical care will  
12 be invited to participate in the study if there is consensus of opinion by the clinic team that  
13 their kidney disease is likely genetic in origin. Patients without a clear clinical indication for  
14 prospective clinical genomic testing will be excluded in the baseline cohort, including an  
15 existing molecularly confirmed genetic diagnosis and those with heterogeneous or complex  
16 diseases with a low or unlikely monogenic diagnosis rate by current genomic sequencing  
17 (such as isolated congenital abnormalities of the kidney and urinary tract (CAKUT)) (12).  
18 Patients who undergo only Sanger sequencing are excluded from the study as this would not  
19 represent a genomic approach to clinical investigation and may instead represent clarification  
20 or segregation of an already identified familial variant. Patients who attend a RGC but do not  
21 undergo genetic testing through the clinic are also excluded from the study. This includes  
22 patients who decline clinically-indicated testing. Written informed consent, both for clinical  
23 genomic testing and participation in the research study will be obtained by the nominated  
24 clinical geneticist, nephrologist or genetic counsellor at each site.

### 25 26 27 28 29 30 31 32 33 34 35 36 37 38 39 40 41 42 43 **Participant Identifiers**

44 All participants will be assigned a unique identifier for the purposes of this study at  
45 recruitment. Study data will be collected and managed using REDCap(13) electronic data  
46 capture tools hosted at Murdoch Children's Research Institute. Access to patient identifying  
47 details is restricted to clinicians providing care and to those who need contact details for  
48 evaluation purposes.

### 49 50 51 52 53 54 55 **Measures**

56 Once consented to the study, baseline demographic information, clinical information, and  
57 detailed phenotypic information will be recorded by clinicians in REDCap. Demographic  
58 data including age, gender, ethnicity, and English language status will be captured for all  
59  
60

1  
2  
3 recruited patients. Further demographic information will be captured in patient surveys.  
4 Clinical data include suspected clinical diagnosis, comorbidities and types of specialists  
5 previously seen. A detailed family history and pedigree will be collected to identify the  
6 number of probands and at-risk relatives presenting for assessment. Comprehensive  
7 phenotypic information will also be collected including the presence of extra-renal features,  
8 renal impairment, urea and creatinine level, CKD stage, presence and details of hypertension,  
9 haematuria, proteinuria and biochemical/haematological abnormalities, results of imaging  
10 including ultrasound, CT and MRI, and results of renal biopsy if already performed. Data will  
11 also be collected regarding type of genomic test, outcomes of test and time taken to achieve  
12 diagnosis. Clinical diagnosis will be recorded as listed in the referral of each patient to the  
13 RGC, at the time of triaging for the RGC, prior to genomic testing and at the time of return of  
14 genomic testing results. This will enable comparison across multiple time points potentially  
15 leading up to a molecular genetic diagnosis.  
16  
17  
18  
19  
20  
21  
22  
23  
24  
25  
26

### 27 **Patient and Public Involvement**

28 The project was reviewed, edited and revised after in depth engagement with the Australian  
29 Genomic Health Alliance (AGHA) Consumer and Community Advisory group. Previous  
30 informal engagement with relevant representative local Australian kidney health patient  
31 organisations, including Polycystic Kidney Disease (PKD) Australia and Kidney Health  
32 Australia (KHA) also occurred. Results from this study will be published and be accessible to  
33 all patients on request.  
34  
35  
36  
37  
38  
39  
40

### 41 **Evaluation Surveys**

42 Evaluation surveys will be distributed to be completed either online or on paper. Adult and  
43 proxy versions are available (parent for child). Participants are asked to complete the first  
44 survey at 2-3 weeks after attending the RGC at which they are offered and consent to testing,  
45 and the second following their receipt of genomic test results. The surveys were developed  
46 based on existing surveys in use in the Melbourne Genomics Health Alliance.  
47  
48  
49  
50  
51  
52

53 The first survey (Table 1) captures additional demographic information and also includes  
54 questions about the experience of the consent process and views on the benefits of the  
55 multidisciplinary renal genetics clinic. The Genetic Counselling Outcomes Survey (14) is  
56 included in survey 1 and 2 to evaluate genetic counselling outcomes of the multidisciplinary  
57 clinic. Knowledge questions and a question on the likelihood of the test finding the cause of  
58  
59  
60

1  
2  
3 the kidney disease are included in survey 1 to gauge understanding. The first survey includes  
4 closed and open questions exploring hopes and expectations for testing. Willingness-to-pay  
5 questions designed specifically for this study are included in both surveys to gauge value.  
6  
7 Validated multi-attribute quality of life instruments (SF-12 for adults and parents(15),  
8  
9 CHU9D for children(16)) are included in surveys 1 and 2 to assess health related quality of  
10  
11 life. The PedsQL(17) family impact module is included in survey 1 and 2 for parents to  
12  
13 assess family impact. Both surveys include questions on family planning.  
14  
15

16  
17 In addition to the measures described above, the second survey includes study-specific  
18  
19 questions assessing understanding of the genomic results, impact this will have on the patient  
20  
21 and their family and perceived value of genomic testing. The Decision Regret scale(18) is  
22  
23 also included in survey 2.  
24  
25

### 26 **Sequencing**

27 Genomic sequencing will be undertaken and reported in clinically accredited laboratories. It  
28  
29 is envisaged that these are likely to include but not be limited to the National Association of  
30  
31 Testing Authorities accredited diagnostic laboratories at Children's Hospital at Westmead,  
32  
33 Victorian Clinical Genetics Service, Genome.One, SA Pathology and PathWest. The specific  
34  
35 clinical test requested for each participant will be selected by the treating clinician/s at the  
36  
37 attending renal genetics clinic according to clinical indication. The spectrum of genomic  
38  
39 testing that will be employed is anticipated to include targeted exome, whole exome and  
40  
41 whole genome sequencing, including the application of virtual gene panels based on patient  
42  
43 phenotype. When additional copy number variation assessment and/or variant confirmation is  
44  
45 indicated, then multiplex ligation-dependent probe application, chromosomal microarray or  
46  
47 Sanger sequencing may be undertaken in addition to genomic sequencing. The cost per test is  
48  
49 expected to be AUD\$1200 to AUD\$2400 depending upon the specific test and diagnostic  
50  
51 provider, with individual test costs to be ascertained directly. Further, each participant will  
52  
53 have genomic sequencing performed once unless technical or sequence quality issues require  
54  
55 re-sequencing to enable clinical reporting. Based on clinical indication, further analysis of  
56  
57 disease or phenotype-specific virtual gene panels may occur, with any such sequence re-  
58  
59 analysis being recorded.  
60

All participants will provide written clinical consent for genomic testing and analysis will be  
restricted to the assessment of genes related to the condition of interest. In this instance,

1  
2  
3 analysis will be limited to a predefined gene list of 360 genes related to nephropathy((19).  
4  
5 Secondary findings unrelated to the presenting condition will not be reported in this study.  
6  
7 Written informed consent for participation in the research study will be attained separately,  
8  
9 which includes options to consent to accessing the Medicare Benefits Schedule (MBS) and  
10  
11 Pharmaceutical Benefits scheme (PBS), hospital and emergency data sets and data sharing in  
12  
13 addition to study evaluation data collection. The MBS and PBS are listings of all medical  
14  
15 services and medicines subsidised by the Australian government, respectively. In addition,  
16  
17 an optional written consent will be obtained in order to share data and samples for use in  
18  
19 ethically approved research outside of the study.

### 20 21 **Health economic evaluation**

22  
23 An economic evaluation will be conducted to assess the incremental cost-effectiveness of  
24  
25 NGS compared with usual care in patients with suspected kidney disease. A microsimulation  
26  
27 model of disease progression will be developed to estimate the lifetime costs and outcomes  
28  
29 associated with usual care and NGS. The analysis will be conducted from an Australian  
30  
31 healthcare system perspective in line with recommended practices(20-22), and based on the  
32  
33 outcomes of cost per additional diagnosis, cost per quality-adjusted life-year (QALY), and  
34  
35 net monetary benefit.

36  
37 Hospital patient-level resource use and cost data will be acquired for each study participant to  
38  
39 cost the diagnostic and short-term medical management in the NGS arm. The additional per-  
40  
41 patient diagnostic investigations that could potentially be incurred in the usual care pathway  
42  
43 will be identified based on a review of national and international guidelines on the diagnosis  
44  
45 of suspected kidney disease and clinical expertise from each of the 16 participating centres  
46  
47 across Australia. The Australia and New Zealand Dialysis and Transplant Registry  
48  
49 (ANZDATA) will be used to undertake a survival analysis of CKD patients. Parametric and  
50  
51 non-parametric methods will be used to estimate transition probabilities for key endpoints  
52  
53 including; all-cause mortality, initiation of dialysis and transplantation. This will allow for the  
54  
55 development of evidence-based transition probabilities while controlling for patient-specific  
56  
57 factors such as age, gender, treatment pathways and disease status. Unit costs associated with  
58  
59 these endpoints and related treatments will be drawn from established national sources (23-  
60  
25). A microsimulation will be used to capture the costs and benefits associated with earlier  
renal replacement therapy and delayed dialysis from the introduction of NGS. To accurately

1  
2  
3 model the implications, registry-derived transition probabilities will be adjusted, on the basis  
4 of published evidence (26), to reflect the impact of new treatment pathways following NGS.  
5  
6  
7

8 For the cost-utility analysis, participants responses to the SF-12 measure will initially be used  
9 to generate utilities at baseline prior to NGS and following the return of NGS findings. A  
10 review of the literature will be undertaken to complement these estimates with evidence from  
11 secondary sources, such as utilities for chronic kidney disease (27) and renal transplantation  
12 (28). The cost-benefit analysis will rely on a contingent valuation exercise that was  
13 undertaken to understand the personal value of NGS to the families. Deterministic and  
14 probabilistic sensitivity analyses will be undertaken to explore the robustness of the findings  
15 to plausible variations in key assumptions around costs, outcomes and transition probabilities,  
16 and to consider the broader issue of generalisability of the study's results. Cost-effectiveness  
17 acceptability curves will be generated to reflect decision uncertainty.  
18  
19  
20  
21  
22  
23  
24  
25  
26

### 27 **Study outcomes**

28 The primary outcome will be the proportion of patients who receive a molecular diagnosis via  
29 genomic testing (diagnostic rate). Secondary outcomes will be change in clinical diagnosis  
30 following genomic testing, change in clinical management following genomic testing and cost-  
31 effectiveness of genomic testing compared to non-genomic diagnostic investigations. Survey  
32 outcomes will include the proportion of patients who preferred to be seen by the  
33 multidisciplinary team compared to those who prefer to be seen in individual clinics. In  
34 addition, the GCOS will be compared before and after testing and between those with a  
35 positive/negative genomic testing result.  
36  
37  
38  
39  
40  
41  
42  
43  
44

### 45 **Data analysis**

46 Results on diagnostic utility and clinical implications will be expressed as frequencies and  
47 percentages for categorical variables and be compared using the chi-square test. Continuous  
48 non-normally distributed variables will be expressed as median (IQR) and compared using  
49 the Mann-Whitney test. Normally distributed continuous variables will be expressed as  
50 mean±SD and compared using the Student's t-test. Multivariable logistic regression will be  
51 performed to determine which variables may predict a positive genomic diagnosis, such as  
52 age of onset of CKD, aetiology of CKD, family history or presence of  
53 haematuria/proteinuria/cysts. This will help to develop professional guidelines regarding  
54 genomic testing in suspected GKD. In addition, the diagnostic rates between different  
55  
56  
57  
58  
59  
60



1  
2  
3 genomic testing modalities will also be compared. The target sample size is 500 patients  
4 across both baseline and replication cohorts.  
5  
6  
7

## 8 **DISCUSSION**

9  
10 In this protocol, we describe the rationale and methods for a prospective observational study  
11 of a national cohort of patients with suspected genetic renal disease that are referred to  
12 multidisciplinary renal genetics clinics throughout Australia. The strengths of this study are  
13 the multicentre design, prospective data collection and a real-world clinical setting. The  
14 absence of a control arm is a limitation of this study however it was not feasible to randomize  
15 patients in this study for two reasons. Firstly, genomic testing is clinically indicated and  
16 performed routinely in most participating states/centres, and it would therefore be unethical  
17 to deny genomic testing to some patients where it is clinically indicated and current standard  
18 of care. Secondly, feedback from patient representatives, the community and genetic  
19 counsellors highlighted that it was unacceptable to deny testing to some patients for the  
20 purpose of a control arm. Further those patients not receiving a genomic test after clinical  
21 assessment are likely to do so in a non-random fashion thus precluding their analysis as a true  
22 control group.  
23  
24  
25  
26  
27  
28  
29  
30  
31  
32  
33

34 Genomic technologies have transformed the concept of precision medicine in many  
35 specialities, however the potential benefits in kidney medicine are yet to be demonstrated.  
36 Until now, the diagnostic utility of genomic testing has been assessed in a small number of  
37 patients or in a research context (29, 30). In addition, while studies which perform genomic  
38 sequencing in larger cohorts (6, 31) are emerging, detailed phenotypic information is not  
39 being collected and there remains a paucity of data on clinical outcomes. Importantly, these  
40 large-scale studies include patients with all types of chronic kidney disease and are thus  
41 powered to understand prevalence of GKD rather than to determine utility and yield in a  
42 cohort in which the clinician suspects genetic disease(6). Data on genomic sequencing in a  
43 real-world clinical environment at a national scale for a targeted population of patients with  
44 suspected GKD are lacking and the health economic impacts of genomic testing are not well  
45 understood or established(32). We believe that collecting such detailed information from a  
46 prospectively ascertained cohort will enable us to determine the diagnostic yield and  
47 comprehensive clinical implications, to inform future practice recommendations.  
48  
49  
50  
51  
52  
53  
54  
55  
56  
57  
58  
59  
60

1  
2  
3 To our knowledge, this is the first time that a structured, objective and minimally bias  
4 approach is undertaken to measure the outcomes of genomic testing in kidney disease.  
5 Results from this study will provide the opportunity to determine the clinical implications of  
6 genomic testing in a large cohort of patients, and further enable analysis of which subgroups  
7 of patients may benefit most. Furthermore, due to the pragmatic nature of this study, these  
8 results more likely to be replicated in a clinical environment. By assessing the utility, cost  
9 effectiveness and implementation aspects of genomic testing in patients with kidney disease,  
10 the results of this study will inform patients, treating physicians and health services and  
11 define priorities for future trials. Collectively, this is anticipated to have significant impacts  
12 upon clinical practice and health service redesign.  
13  
14  
15  
16  
17  
18  
19  
20  
21

## 22 **FUNDING STATEMENT**

23  
24 Operating as the KidGen Renal Genetics Flagship, this work was supported by the Melbourne  
25 Genomics Health Alliance (Melbourne Genomics) and grants from the Royal Children's  
26 Hospital Foundation and by the NHMRC Genomics TCR Grant 1113531, entitled Preparing  
27 Australia for Genomic Medicine: A proposal by the Australian Genomics Health Alliance.  
28 Melbourne Genomics is funded by the 10 members and the State Government of Victoria  
29 (Department of Health and Humans Services). In kind funding support was provided for renal  
30 genetics clinic operation and genomic test provision by Queensland Health (Metro North  
31 Hospital and Health Service; Children's Health Queensland Hospital and Health Service),  
32 New South Wales Health, South Australia Health, Western Australia Department of Health,  
33 Northern Territory Department of Health and Tasmanian Department of Health and Human  
34 Services.  
35  
36  
37  
38  
39  
40  
41  
42  
43  
44

## 45 **ETHICS AND DISSEMINATION**

### 46 **Ethics**

47  
48 Ethics approval for this project has been obtained by Australian Genomics Health Alliance as  
49 part of the research study Australian Genomics Health Alliance: Preparing Australia for  
50 Genomic Medicine and issued by Melbourne Health HREC/16/MH/251. Governance site  
51 specific approval for the project has been obtained for each of the participating clinic sites.  
52 All participants will provide written informed consent for data collection and to undergo  
53 clinically relevant genetic/genomic testing.  
54  
55  
56  
57  
58  
59  
60

## Dissemination Plan

The main findings of this study will be published in peer-reviewed journals and will also be presented at national and international conferences. We will also issue reports of results of the study to the Australian Government, State/Territory Governments and health organizations in order to inform future policy and guidelines. This study will also contribute to the training and development of post-doctoral students.

## CONTRIBUTOR SHIP STATEMENT

KJ contributed to the design of the study and drafted the manuscript. CQ and AJM (Andrew John Mallett) conceived the project and obtained funding for the clinical flagships and research study, made substantial contributions to the design of the study and were major contributors in drafting the manuscript. LW and ZS undertook significant project design and data management elements, provided specific design elements around outcome analysis and were major contributors in drafting the manuscript. IG, YW and MM provided specific design elements around health economic analysis. SB provided specific implementation design elements. AM (Amali Mallawaarachchi), HM, RF, AC, MS, MJ, PK and CP contributed to regionalised study design and implementation. All authors contributed to the drafting of the manuscript, read and approved the final manuscript. In addition to the authors listed, the broader KidGen Collaborative scientific, clinical and diagnostic membership had input into this protocol.

**COMPETING INTERESTS:** No, there are no competing interests for any author

## REFERENCES

1. Mallett A, Patel C, Salisbury A, Wang Z, Healy H, Hoy W. The prevalence and epidemiology of genetic renal disease amongst adults with chronic kidney disease in Australia. *Orphanet Journal of Rare Diseases*. 2014;9:98-.
2. Vivante A, Hildebrandt F. Exploring the genetic basis of early-onset chronic kidney disease. *Nature Reviews Nephrology*. 2016;12(3):133-46.
3. Rabbani B, Mahdieh N, Hosomichi K, Nakaoka H, Inoue I. Next-generation sequencing: impact of exome sequencing in characterizing Mendelian disorders. *Journal of human genetics*. 2012;57(10):621-32.
4. Groopman EE, Rasouly HM, Gharavi AG. Genomic medicine for kidney disease. *Nature reviews Nephrology*. 2018;14(2):83-104.
5. Mallett A, Fowles LF, McGaughran J, Healy H, Patel C. A multidisciplinary renal genetics clinic improves patient diagnosis. *Med J Aust*. 2016;204(2):58-9.
6. Groopman EE, Marasa M, Cameron-Christie S, Petrovski S, Aggarwal VS, Milo-Rasouly H, et al. Diagnostic Utility of Exome Sequencing for Kidney Disease. *The New England journal of medicine*. 2018.
7. Bresin E, Daina E, Noris M, Castelletti F, Stefanov R, Hill P, et al. Outcome of renal transplantation in patients with non-Shiga toxin-associated hemolytic uremic syndrome: prognostic significance of genetic background. *Clin J Am Soc Nephrol*. 2006;1(1):88-99.
8. Sellier-Leclerc AL, Fremeaux-Bacchi V, Dragon-Durey MA, Macher MA, Niaudet P, Guest G, et al. Differential impact of complement mutations on clinical characteristics in atypical hemolytic uremic syndrome. *J Am Soc Nephrol*. 2007;18(8):2392-400.
9. Gross O, Licht C, Anders HJ, Hoppe B, Beck B, Tonshoff B, et al. Early angiotensin-converting enzyme inhibition in Alport syndrome delays renal failure and improves life expectancy. *Kidney Int*. 2012;81(5):494-501.
10. Varner JD, Chryst-Stangl M, Esezobor CI, Solarin A, Wu G, Lane B, et al. Genetic Testing for Steroid-Resistant-Nephrotic Syndrome in an Outbred Population. *Frontiers in pediatrics*. 2018;6:307.
11. Alkanderi S, Yates LM, Johnson SA, Sayer JA. Lessons learned from a multidisciplinary renal genetics clinic. *Qjm*. 2017;110(7):453-7.
12. Nicolaou N, Pulit SL, Nijman IJ, Monroe GR, Feitz WF, Schreuder MF, et al. Prioritization and burden analysis of rare variants in 208 candidate genes suggest they do not play a major role in CAKUT. *Kidney international*. 2016;89(2):476-86.
13. Harris PA, Taylor R, Thielke R, Payne J, Gonzalez N, Conde JG. Research electronic data capture (REDCap)--a metadata-driven methodology and workflow process for providing translational research informatics support. *J Biomed Inform*. 2009;42(2):377-81.
14. McAllister M, Wood AM, Dunn G, Shiloh S, Todd C. The Genetic Counseling Outcome Scale: a new patient-reported outcome measure for clinical genetics services. *Clin Genet*. 2011;79(5):413-24.
15. Brazier JE, Roberts J. The estimation of a preference-based measure of health from the SF-12. *Med Care*. 2004;42(9):851-9.
16. Furber G, Segal L. The validity of the Child Health Utility instrument (CHU9D) as a routine outcome measure for use in child and adolescent mental health services. *Health and quality of life outcomes*. 2015;13:22.
17. Glascoe FP. Using parents' concerns to detect and address developmental and behavioral problems. *Journal of the Society of Pediatric Nurses : JSPN*. 1999;4(1):24-35.
18. Brehaut JC, O'Connor AM, Wood TJ, Hack TF, Siminoff L, Gordon E, et al. Validation of a decision regret scale. *Medical decision making : an international journal of the Society for Medical Decision Making*. 2003;23(4):281-92.

19. Little MH, Quinlan C. Advances in our understanding of genetic kidney disease using kidney organoids. *Pediatric nephrology* (Berlin, Germany). 2019.
20. Husereau D, Drummond M, Petrou S, Carswell C, Moher D, Greenberg D, et al. Consolidated Health Economic Evaluation Reporting Standards (CHEERS)--explanation and elaboration: a report of the ISPOR Health Economic Evaluation Publication Guidelines Good Reporting Practices Task Force. *Value in health : the journal of the International Society for Pharmacoeconomics and Outcomes Research*. 2013;16(2):231-50.
21. Philips Z, Ginnelly L, Sculpher M, Claxton K, Golder S, Riemsma R, et al. Review of guidelines for good practice in decision-analytic modelling in health technology assessment 2004. iii-iv, ix p.
22. Committee PBA. Guidelines for preparing submissions to the Pharmaceutical Benefits Advisory Committee. In: Health AGDo, editor. 5.0 ed. Canberra: Australian Government Department of Health; 2016.
23. Australia M. Medicare Australia. Pharmaceutical Benefits Schedule item reports. Health Insurance Commission; 2018.
24. Australia M. Medicare Benefits Schedule (MBS) item statistics reports. Health Insurance Commission; 2018.
25. Government A. National Hospital Cost Data Collection Cost Report Round 20 (2015-2016). Report. Canberra, Australia 2015-2016.
26. ANZDATA. The 40th Annual Report: ANZDATA Registry Report. Adelaide: Australia and New Zealand Dialysis and Transplant Registry; 2017.
27. Gorodetskaya I, Zenios S, McCulloch CE, Bostrom A, Hsu CY, Bindman AB, et al. Health-related quality of life and estimates of utility in chronic kidney disease. *Kidney international*. 2005;68(6):2801-8.
28. Laupacis A, Keown P, Pus N, Krueger H, Ferguson B, Wong C, et al. A study of the quality of life and cost-utility of renal transplantation. *Kidney international*. 1996;50(1):235-42.
29. Sadowski CE, Lovric S, Ashraf S, Pabst WL, Gee HY, Kohl S, et al. A single-gene cause in 29.5% of cases of steroid-resistant nephrotic syndrome. *J Am Soc Nephrol*. 2015;26(6):1279-89.
30. Heidet L, Moriniere V, Henry C, De Tomasi L, Reilly ML, Humbert C, et al. Targeted Exome Sequencing Identifies PBX1 as Involved in Monogenic Congenital Anomalies of the Kidney and Urinary Tract. *J Am Soc Nephrol*. 2017;28(10):2901-14.
31. Lata S, Marasa M, Li Y, Fasel DA, Groopman E, Jobanputra V, et al. Whole-Exome Sequencing in Adults With Chronic Kidney Disease: A Pilot Study. *Ann Intern Med*. 2018;168(2):100-9.
32. Schwarze K, Buchanan J, Taylor JC, Wordsworth S. Are whole-exome and whole-genome sequencing approaches cost-effective? A systematic review of the literature. *Genet Med*. 2018.

1  
2  
3  
4  
5  
6  
7  
8  
9  
10  
11  
12  
13  
14  
15  
16  
17  
18  
19  
20  
21  
22  
23  
24  
25  
26  
27  
28  
29  
30  
31  
32  
33  
34  
35  
36  
37  
38  
39  
40  
41  
42  
43  
44  
45  
46  
47  
48  
49  
50  
51  
52  
53  
54  
55  
56  
57  
58  
59  
60

**TABLES**
**Table 1.** Summary of survey measures

| Measure                                    | Description                                                                                                                                                                                           | S1 | S2 |
|--------------------------------------------|-------------------------------------------------------------------------------------------------------------------------------------------------------------------------------------------------------|----|----|
| Demographics                               | Age, gender, marital status, education, income, number of dependents in household, postcode, private health insurance status.                                                                         | X  |    |
| Patient reported outcomes measures         | CHU9D[ref] and PEDS family impact[ref] for paediatric surveys<br>OR<br>SF-12 [ref] for adult surveys                                                                                                  | X  | X  |
| Experience of the multidisciplinary clinic | Three study specific questions exploring advantages and disadvantages of multidisciplinary renal genetics clinics                                                                                     | X  | X  |
| Genetic counselling                        | 24-item scale measuring outcomes of genetic counselling GCOS-24[ref]                                                                                                                                  | X  | X  |
| Family planning                            | Four study specific questions addressing plans for another child, estimated recurrence of the kidney condition, concern about recurrence, interest in reproductive technologies (parent surveys only) | X  |    |

|                            |                                                                                                                                                                                                                                                                                                                                                               |   |   |
|----------------------------|---------------------------------------------------------------------------------------------------------------------------------------------------------------------------------------------------------------------------------------------------------------------------------------------------------------------------------------------------------------|---|---|
| Understanding              | In survey 1, 8 study specific questions address participant understanding of: types of potential results (4 questions), potential familial implications (1 question), ways in which the data can be used (2 questions); number of genes examined (1 question).<br>In survey 2, 2 study specific questions used to measure recall and understanding of result. | X | X |
| Willingness to pay (value) | Study specific questions included to establish a quantitative reference for the value placed on testing                                                                                                                                                                                                                                                       | X | X |
| Information provision      | Study specific questions to assess participant perception about the way in which information (3 items – S1) and results (3 items – S2) were provided                                                                                                                                                                                                          | X | X |
| Hopes/<br>Expectation      | Eight study specific questions exploring participants reasons for agreeing to the test, rated on a 5 point scale as extremely unimportant to extremely important                                                                                                                                                                                              | X |   |
| Likelihood                 | One study specific question to determine participant's perception of the likelihood testing will find the cause of the condition .                                                                                                                                                                                                                            | X |   |
| Decision regret            | 5 item scale measuring distress or remorse after a (health care) decision [ref O'Connor]                                                                                                                                                                                                                                                                      |   | X |
| Value of the test          | Eleven study specific questions exploring the value to participants of having had the test rated on a 4 point scale as not valuable to extremely valuable or not applicable                                                                                                                                                                                   |   | X |

|                    |                                                                                     |  |   |
|--------------------|-------------------------------------------------------------------------------------|--|---|
| Impact of the test | Two study specific questions asking about the impact of the test on family planning |  | X |
|--------------------|-------------------------------------------------------------------------------------|--|---|

## FIGURES

**Figure 1.** Participating Renal Genetics Clinics

**Figure 2.** Patient flow within a KidGen Renal Genetics Clinic

**Figure 3.** Recruitment workflow within the KidGen Renal Genetics Clinic network



1  
2  
3  
4  
5  
6  
7  
8  
9  
10  
11  
12  
13  
14  
15  
16  
17  
18  
19  
20  
21  
22  
23  
24  
25  
26  
27  
28  
29  
30  
31  
32  
33  
34  
35  
36  
37  
38  
39  
40  
41  
42  
43  
44  
45  
46  
47  
48  
49  
50  
51  
52  
53  
54  
55  
56  
57  
58  
59  
60



Figure 1. Participating Renal Genetics Clinics



\* Prior to reporting results may be interpreted at a MDT by clinicians and laboratory scientists.

Figure 2. Patient flow within a KidGen Renal Genetics Clinic

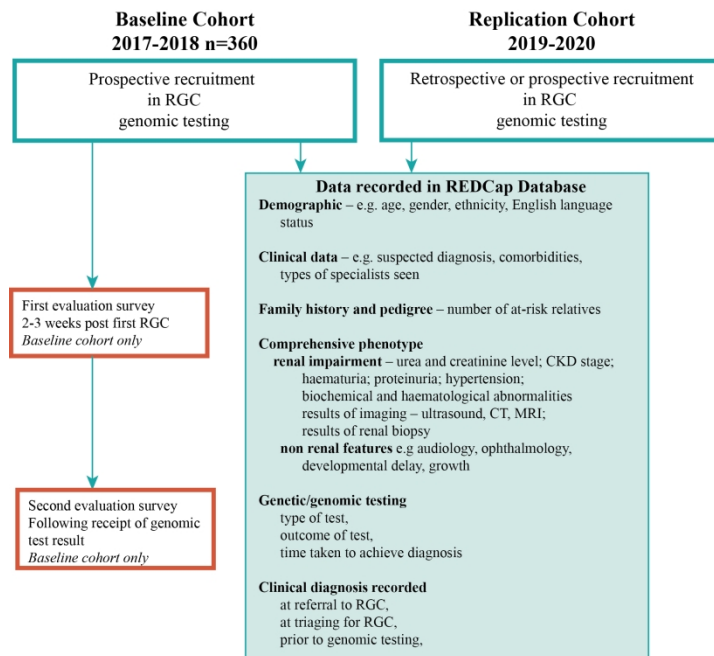

Figure 3. Recruitment workflow within the KidGen Renal Genetics Clinic network
